# Supplementary material for: Apple Variety Identification Using Near-Infrared Spectroscopy
Source: Hindawi journal article supplement (doi:10.1155/2018/6935197), 2018-08-27
Supplement: f1 [file 6935197.f1.xlsx]

## Sheet: Sheet1
Apple variety	wavelength Average value No.	400.093	400.463	400.834	401.204	401.574	401.944	402.314	402.685	403.055	403.425	403.795	404.165	404.535	404.905	405.275	405.644	406.014	406.384	406.754	407.123	407.493	407.863	408.232	408.602	408.972	409.341	409.711	410.08	410.449	410.819	411.188	411.557	411.927	412.296	412.665	413.034	413.403	413.772	414.142	414.511	414.88	415.248	415.617	415.986	416.355	416.724	417.093	417.461
FUJI APPLE (A)	1	391.9	387.609	388.973	409.942	411.209	398.14	424.473	422.522	415.499	415.89	423.885	422.912	426.813	420.279	428.47	436.371	444.074	438.028	459.385	448.364	447	449.145	458.605	460.946	458.313	475.964	485.13	484.155	469.137	489.812	485.813	485.423	506.099	505.807	515.265	513.51	510.78	502.879	514.778	526.577	538.963	546.375	563.44	556.03	547.253	549.008	549.397	568.22
	2	435.06	423.995	450.167	446.977	465.275	450.806	455.486	449.955	466.126	452.403	471.339	487.51	473.147	483.467	496.872	477.615	484.106	492.828	506.765	505.702	491.446	508.468	507.297	526.341	534.638	506.553	541.555	542.619	534.959	534.32	565.599	539.852	549.322	561.13	570.598	565.812	576.557	586.664	572.088	604.537	612.622	605.175	619.538	618.26	617.942	616.238	630.07	654.858
	3	372.817	368.255	387.329	401.139	404.531	401.255	406.053	403.128	412.139	417.406	402.426	424.31	408.043	414.245	419.043	403.127	415.651	434.726	434.961	440.576	443.502	453.918	436.715	470.184	448.769	443.853	463.512	453.449	476.387	469.832	482.354	461.757	484.58	483.409	489.962	492.068	509.153	493.824	499.206	493.239	511.73	521.676	532.795	536.774	524.251	522.73	535.018	536.656
	4	372.403	380.762	387.783	399.041	397.146	385.22	406.063	418.211	405.728	415.089	384.551	422.445	408.737	419.994	423.114	427.239	411.858	416.762	456.105	430.694	439.052	432.365	448.302	459.895	443.621	449.082	445.183	486.754	468.141	477.838	489.652	482.408	502.025	483.633	498.68	480.513	494.669	487.311	477.727	495.784	522.308	523.424	528.772	517.182	535.683	516.067	532.45	556.859
	5	355.078	362.588	379.849	383.75	380.533	368.635	382.873	391.162	381.898	395.454	401.109	401.694	390.577	406.571	411.058	408.522	397.207	419.053	426.563	413.884	420.711	432.707	427.051	426.758	427.44	431.439	455.332	459.33	448.31	428.317	457.283	444.507	459.915	483.516	470.448	479.809	463.036	487.221	473.959	482.54	493.56	503.411	518.721	525.255	506.043	509.067	519.989	533.544
	6	342.63	361.035	353.48	362.736	366.46	374.865	363.269	373.162	376.993	382.844	384.12	375.078	377.311	392.525	396.567	372.205	386.141	394.12	408.803	408.803	416.037	405.185	425.505	421.569	409.973	425.293	423.909	445.932	429.761	434.975	443.805	438.485	466.358	451.145	474.55	471.252	480.189	476.253	472.635	469.55	486.891	503.487	492.85	515.297	505.296	491.997	496.573	518.807
	7	349.464	359.411	344.198	355.08	373.337	371.113	364.093	376.38	365.729	398.265	383.401	397.444	383.05	393.349	406.223	393.582	392.647	407.509	405.986	411.488	411.722	410.318	419.914	441.681	432.67	428.457	441.213	464.851	433.022	440.979	462.863	460.755	464.5	461.927	475.735	465.086	475.736	480.651	473.512	472.109	486.502	526.175	525.355	510.375	516.227	519.971	544.548	530.152
	8	384.985	397.113	392.644	402.54	407.113	407.965	407.007	418.604	411.368	412.113	408.603	426.051	430.413	422.327	461.371	434.987	442.435	446.158	460.094	445.2	457.541	461.478	461.159	465.202	457.649	475.097	475.416	503.82	501.481	478.605	515.63	483.393	514.246	513.608	529.035	525.098	538.183	529.247	525.95	555.844	552.014	573.397	567.971	573.611	586.483	568.929	586.377	590.634
	9	333.438	349.821	335.518	338.509	348.521	335.908	337.468	376.476	351.251	351.642	353.852	371.146	357.491	352.942	379.857	368.286	361.263	371.146	376.996	391.301	381.938	401.962	399.881	407.815	392.21	401.443	413.016	437.851	415.095	396.763	436.031	420.688	430.309	442.791	440.062	432.649	442.922	439.281	434.991	444.483	452.415	473.869	482.841	485.572	483.751	475.558	494.803	514.698
	10	310.942	311.967	329.815	317.671	319.134	327.475	309.481	336.397	333.179	340.785	327.766	348.978	341.078	339.322	347.661	351.757	346.199	352.928	376.48	357.024	369.897	377.211	370.921	385.11	372.383	387.598	378.234	395.348	397.251	393.154	414.805	410.856	411.001	424.899	422.704	421.535	416.853	427.094	415.976	421.388	428.558	465.712	469.368	452.108	476.245	452.255	438.064	472.295
	11	332.36	381.51	353.42	393.21	360.44	369.8	437.68	339.38	414.27	386.19	400.23	395.55	440.02	393.21	388.53	404.91	395.55	388.53	395.55	423.64	395.55	390.87	379.17	444.7	365.12	388.53	409.59	517.26	468.11	404.91	444.7	409.59	379.17	402.57	482.15	433	416.62	440.02	461.09	433	482.15	479.81	458.75	425.98	470.45	512.58	540.66	475.13
	12	338.5	350.2	298.71	223.81	279.99	254.24	282.33	401.69	389.99	352.54	326.8	345.52	261.26	329.14	317.44	268.28	322.12	340.84	333.82	340.84	333.82	312.75	401.69	448.51	401.69	329.14	345.52	394.67	406.38	382.97	413.4	371.27	387.65	373.61	397.01	336.16	364.25	364.25	357.22	397.01	448.51	385.31	432.12	485.95	469.57	375.95	502.34	457.87
	13	269.31	285.69	262.29	337.18	358.25	255.26	248.24	344.21	313.78	327.82	341.86	332.5	316.12	337.18	304.42	337.18	271.65	339.52	325.48	372.29	367.61	360.59	292.71	334.84	325.48	400.38	355.91	407.4	376.97	383.99	407.4	360.59	435.49	344.21	430.8	393.36	482.3	412.08	348.89	393.36	472.93	398.04	461.23	477.62	423.78	386.33	395.7	475.28
	14	395.55	493.85	465.77	390.87	437.68	411.93	353.42	409.59	456.4	444.7	414.27	500.87	486.83	470.45	517.26	517.26	451.72	500.87	493.85	437.68	475.13	550.03	533.64	517.26	472.79	505.56	547.69	470.45	557.05	540.66	554.71	608.54	589.82	585.13	547.69	538.32	603.86	603.86	667.05	564.07	638.97	716.2	711.52	737.27	655.35	671.73	660.03	688.12
	15	317.87	275.74	322.56	301.49	348.3	320.21	268.72	259.36	364.68	303.83	334.26	360	296.81	233.61	264.04	308.51	334.26	285.11	331.92	301.49	315.53	331.92	324.9	345.96	427.88	376.39	348.3	360	329.58	360	402.13	427.88	432.56	371.71	409.15	444.26	439.58	390.43	362.34	423.2	467.67	491.07	514.48	601.08	479.37	477.03	477.03	472.35
	16	338.5	350.2	298.71	223.81	279.99	254.24	282.33	401.69	389.99	352.54	326.8	345.52	261.26	329.14	317.44	268.28	322.12	340.84	333.82	340.84	333.82	312.75	401.69	448.51	401.69	329.14	345.52	394.67	406.38	382.97	413.4	371.27	387.65	373.61	397.01	336.16	364.25	364.25	357.22	397.01	448.51	385.31	432.12	485.95	469.57	375.95	502.34	457.87
	17	324.46	319.78	324.46	294.03	261.26	287.01	378.29	256.58	326.8	305.73	333.82	375.95	389.99	254.24	322.12	336.16	322.12	296.37	301.05	340.84	361.91	354.88	368.93	394.67	331.48	324.46	413.4	478.93	404.03	439.14	392.33	364.25	415.74	422.76	481.27	361.91	429.78	397.01	401.69	389.99	361.91	474.25	511.7	425.1	509.36	530.42	495.32	507.02
	18	356.05	311.58	351.37	323.29	353.71	398.18	356.05	349.03	299.88	386.48	419.25	337.33	433.29	370.1	351.37	363.08	398.18	325.63	414.57	372.44	421.59	384.14	487.12	526.91	454.36	489.46	475.42	496.49	508.19	487.12	496.49	517.55	440.31	480.1	491.81	477.76	498.83	505.85	580.75	536.28	562.02	503.51	503.51	529.25	557.34	552.66	583.09	620.53
	19	238.88	281.01	215.48	266.97	257.61	255.26	297.39	327.82	245.9	313.78	266.97	306.76	264.63	269.31	325.48	278.67	290.37	288.03	325.48	306.76	290.37	273.99	374.63	367.61	332.5	344.21	327.82	309.1	327.82	372.29	360.59	367.61	402.72	447.19	379.31	334.84	376.97	304.42	367.61	348.89	325.48	388.68	437.83	442.51	451.87	435.49	383.99	414.42
	20	318.31	255.12	278.52	308.95	238.73	278.52	222.35	390.87	294.91	332.36	367.46	318.31	306.61	330.02	372.15	339.38	264.48	322.99	404.91	369.8	278.52	355.76	360.44	351.08	337.04	294.91	376.83	395.55	379.17	409.59	369.8	409.59	440.02	393.21	433	388.53	421.3	423.64	414.27	433	463.43	409.59	456.4	475.13	451.72	395.55	454.06	526.62
	21	352.54	315.09	315.09	343.18	331.48	282.33	315.09	357.22	265.94	310.41	350.2	364.25	359.56	331.48	406.38	427.44	324.46	387.65	404.03	350.2	303.39	324.46	464.89	420.42	441.48	389.99	471.91	432.12	418.08	450.85	483.61	455.53	436.8	500	476.59	474.25	457.87	488.29	408.72	492.98	485.95	478.93	492.98	560.85	464.89	518.72	556.17	525.74
	22	279.99	256.58	357.22	340.84	310.41	228.49	277.65	352.54	319.78	301.05	244.88	294.03	326.8	352.54	385.31	366.59	312.75	380.63	279.99	408.72	340.84	397.01	287.01	324.46	354.88	333.82	347.86	418.08	350.2	425.1	380.63	413.4	411.06	453.19	397.01	345.52	446.16	404.03	450.85	425.1	436.8	481.27	497.66	443.82	464.89	453.19	446.16	507.02
	23	377.12	360.74	370.1	320.95	346.69	346.69	377.12	349.03	353.71	374.78	400.52	358.39	330.31	379.46	367.76	337.33	388.82	398.18	405.21	426.27	332.65	384.14	323.29	449.68	437.97	316.26	386.48	395.84	360.74	423.93	419.25	419.25	449.68	449.68	407.55	489.46	400.52	381.8	405.21	416.91	433.29	435.63	522.23	437.97	466.06	452.02	491.81	484.78
	24	331.04	373.17	326.36	394.23	424.66	375.51	345.08	434.02	317	342.74	366.15	436.36	340.4	384.87	373.17	401.26	394.23	419.98	469.13	436.36	398.92	405.94	342.74	504.24	384.87	403.6	429.34	412.96	450.41	422.32	494.88	441.04	422.32	445.73	455.09	478.49	497.22	422.32	434.02	469.13	480.83	452.75	513.6	459.77	457.43	492.54	508.92	506.58
	25	369.37	465.33	383.41	413.84	441.92	451.28	441.92	411.5	434.9	460.65	484.05	451.28	420.86	439.58	441.92	446.6	453.63	460.65	467.67	472.35	505.12	542.57	512.14	551.93	537.88	516.82	598.74	565.97	568.31	512.14	434.9	575.33	505.12	542.57	549.59	551.93	540.22	540.22	542.57	554.27	565.97	577.67	617.46	582.35	591.72	603.42	558.95	654.91
	26	274.28	374.92	400.67	419.39	367.9	335.14	391.31	391.31	400.67	374.92	431.1	405.35	381.95	410.03	370.24	417.05	433.44	463.86	398.33	412.37	353.86	442.8	417.05	410.03	370.24	445.14	421.74	517.7	445.14	414.71	440.46	468.55	431.1	445.14	447.48	491.95	470.89	487.27	491.95	496.63	468.55	440.46	520.04	515.36	505.99	505.99	496.63	438.12
	27	356.05	407.55	351.37	393.5	367.76	330.31	381.8	367.76	374.78	449.68	414.57	388.82	377.12	400.52	412.23	407.55	398.18	384.14	416.91	419.25	374.78	433.29	407.55	372.44	428.61	363.08	435.63	444.99	466.06	470.74	447.33	437.97	470.74	449.68	496.49	461.38	430.95	393.5	419.25	501.17	494.15	452.02	482.44	496.49	505.85	482.44	477.76	477.76
	28	395.7	400.38	332.5	325.48	306.76	381.65	407.4	348.89	309.1	414.42	344.21	365.27	367.61	388.68	316.12	402.72	421.44	309.1	358.25	456.55	362.93	444.85	409.74	374.63	318.46	344.21	381.65	393.36	412.08	484.64	391.02	435.49	421.44	472.93	489.32	461.23	451.87	416.76	479.96	433.15	522.09	391.02	379.31	463.57	475.28	517.4	463.57	421.44
	29	410.47	321.53	497.07	326.21	401.11	429.2	377.7	417.49	417.49	396.43	380.04	452.6	471.33	452.6	412.81	443.24	433.88	473.67	426.86	494.73	436.22	443.24	471.33	522.82	492.39	501.75	468.98	522.82	522.82	595.37	534.52	459.62	513.46	560.27	492.39	567.29	511.11	541.54	466.64	593.03	602.4	576.65	590.69	567.29	522.82	564.95	590.69	649.21
	30	341.86	395.7	325.48	416.76	381.65	325.48	355.91	372.29	365.27	398.04	355.91	386.33	435.49	320.8	402.72	311.44	369.95	393.36	383.99	400.38	405.06	398.04	414.42	503.36	465.91	330.16	489.32	468.25	423.78	391.02	486.98	475.28	486.98	510.38	491.66	451.87	433.15	440.17	454.21	522.09	489.32	531.45	538.47	550.17	589.96	494	346.55	524.43
	31	380.578	393.116	401.14	389.27	382.917	391.444	392.281	397.63	403.315	394.285	397.129	419.696	399.804	423.541	440.427	432.238	409.501	429.561	436.249	440.764	438.59	440.428	432.738	460.156	436.249	444.441	466.342	457.314	469.684	465.672	480.386	462.161	473.029	497.604	500.279	495.095	492.924	479.046	481.387	503.622	516.161	529.368	535.888	526.191	550.934	526.024	519.841	553.109
	32	360.936	386.536	379.075	384.78	397.653	379.661	391.218	399.702	386.974	405.992	413.598	416.377	403.359	401.017	405.405	407.308	408.479	413.598	426.471	431.738	424.131	439.198	439.052	453.241	439.342	434.225	453.387	490.398	465.966	470.794	463.188	478.988	483.083	487.765	496.101	483.814	492.446	478.255	492.299	508.244	507.659	508.537	535.452	527.26	524.774	523.456	504.734	529.893
	33	433.034	449.712	445.324	457.026	467.266	441.96	464.194	476.92	456.15	505.3	475.312	511.882	494.767	492.572	499.156	493.89	495.793	518.609	529.874	523.001	512.759	529.436	517.296	536.165	551.964	525.486	553.134	563.082	559.424	557.084	587.952	554.304	582.097	598.923	614.719	601.554	597.312	608.722	608.576	624.814	609.308	637.832	637.1	629.64	664.018	641.197	643.244	680.401
	34	313.304	327.638	319.739	332.464	340.949	335.976	325.006	330.711	334.659	338.317	332.174	353.676	353.969	346.947	368.013	365.966	368.452	381.91	374.303	390.687	359.382	368.012	378.984	395.953	365.964	379.275	399.024	417.017	421.259	397.414	412.628	410.728	433.111	431.793	434.719	414.384	434.279	433.109	421.261	441.886	454.027	455.783	466.608	476.702	464.704	462.073	481.968	479.334
	35	186.804	176.858	191.778	197.628	186.951	189.877	195.142	203.772	199.823	206.993	199.382	223.521	203.041	214.452	225.423	221.767	227.617	224.838	259.214	220.743	248.536	248.096	255.264	264.627	248.974	252.339	249.999	272.819	269.894	256.729	278.231	277.5	287.739	301.052	291.981	282.034	289.202	314.656	304.123	307.196	315.679	345.376	333.966	341.134	337.183	346.545	338.354	379.315
	36	66.7827	68.3433	60.2287	94.8693	86.6	58.0447	90.656	89.8767	81.138	101.578	75.3633	93.3093	93.62	88.6293	106.571	84.1027	95.6493	109.849	116.869	90.502	114.531	98.9267	120.772	139.652	119.836	111.409	144.489	155.255	145.268	130.601	148.702	152.292	155.411	159.938	153.383	136.219	165.397	181.314	178.817	166.647	186.931	212.989	198.009	205.499	213.299	198.165	217.046	228.595
	37	135.751	145.615	135.082	156.313	165.343	143.607	155.312	163.002	129.9	167.014	140.098	165.174	159.157	161.665	175.374	163.67	144.277	164.004	190.586	187.911	189.583	179.886	192.426	221.85	187.244	187.243	206.971	213.992	217.836	203.125	227.534	207.806	220.01	231.879	243.918	226.196	244.753	250.271	235.891	243.584	255.619	271.335	264.146	280.363	276.517	274.846	277.856	290.728
	38	89.5653	111.721	118.431	112.19	129.041	116.246	133.411	130.914	114.063	103.295	106.729	134.503	114.999	123.113	147.142	121.864	119.523	135.439	147.609	141.211	151.823	153.384	158.222	154.63	154.319	150.575	182.406	198.79	171.482	166.333	184.745	185.839	197.697	195.201	194.108	203.627	201.911	219.074	202.222	206.123	221.258	242.481	241.075	239.515	245.912	229.529	225.94	246.223
	39	89.6592	98.3023	107.484	111.446	116.667	106.044	97.9431	119.548	108.924	124.048	129.629	144.753	115.226	136.292	140.432	133.05	120.808	134.851	139.352	133.771	145.113	162.218	147.455	160.778	158.616	148.715	158.615	183.461	152.495	154.295	176.08	162.037	196.426	186.522	175.541	172.478	177.341	194.804	185.262	192.824	190.302	221.272	223.252	218.388	205.427	223.971	230.452	235.673
	40	157.318	164.172	171.194	161.997	183.899	175.205	164.672	190.586	172.029	225.694	192.926	214.661	200.616	202.121	217.67	192.091	223.521	223.688	244.252	237.899	240.406	244.586	242.747	275.181	245.089	255.453	274.677	296.078	292.233	256.623	300.425	277.856	295.409	299.254	308.116	295.409	322.995	340.214	300.76	322.994	339.21	371.811	378.833	364.289	374.987	352.751	367.464	397.054
	41	324.584	307.731	323.335	319.59	318.341	313.659	314.597	342.526	334.569	355.323	347.677	369.053	343.463	342.841	360.473	373.735	349.393	352.045	385.437	378.259	363.593	390.119	395.579	413.525	395.111	385.126	413.212	441.299	417.894	429.438	443.17	440.831	448.009	452.534	450.191	426.473	465.016	440.83	448.163	451.598	472.037	500.279	514.791	515.259	508.861	504.18	503.245	541.161
	42	6.086	16.228	11.8593	5.61733	13.2627	8.582	23.5613	17.632	21.2207	25.4347	15.604	35.2633	34.3273	28.866	37.1373	17.7873	33.7033	34.328	57.2647	30.582	51.4913	48.5267	45.5633	51.336	50.4	40.5693	44.3147	66.47	69.2787	57.5753	63.6613	61.01	76.926	79.89	93.3087	87.38	82.3867	83.7913	78.954	90.5007	120.303	122.176	152.916	131.071	122.021	107.977	121.707	154.475
	43	38.785	47.6457	66.2043	60.6864	53.665	42.7971	55.6714	70.0479	51.325	77.5714	72.2214	78.2421	72.3886	86.4314	95.795	91.6157	84.4264	82.7536	121.039	87.4357	94.7907	95.1257	106.997	111.842	105.659	115.856	109.002	135.084	152.469	127.225	140.433	130.736	140.097	146.284	162.5	159.156	177.211	168.519	135.751	184.569	174.371	190.42	202.959	211.819	201.119	190.753	213.656	230.208
	44	59.606	66.6293	72.3993	82.0753	80.5147	59.604	80.8267	83.4793	81.6067	102.827	67.096	110.941	99.082	94.402	106.105	94.7127	111.877	94.4013	120.147	100.956	108.133	138.091	125.453	142.147	119.367	122.489	124.828	152.291	134.347	152.915	144.332	139.809	176.32	164.617	152.134	150.887	153.695	159.314	169.61	177.255	167.739	196.917	222.194	204.563	199.725	191.144	208.307	207.995
	45	122.438	137.067	125.951	151.548	148.916	137.946	145.26	155.499	163.981	160.472	135.898	185.048	145.699	162.375	172.321	163.399	179.197	177.295	201.578	161.789	179.051	187.243	195.142	222.351	203.334	190.023	210.356	235.371	203.041	227.031	242.977	247.949	243.416	230.983	265.358	238.296	255.118	235.809	248.244	260.53	275.453	291.983	288.911	279.402	294.323	306.756	309.683	336.598
	46	166.335	178.349	164.15	172.576	183.809	183.029	198.634	200.817	187.399	218.919	195.669	218.919	218.295	214.393	234.053	210.336	226.095	242.792	244.821	231.87	249.813	258.551	256.522	251.375	261.047	249.19	270.877	276.184	273.217	280.085	286.171	278.211	294.44	282.738	312.228	311.76	305.673	315.193	318	315.037	324.553	344.839	342.499	347.492	334.854	355.918	369.648	380.415
	47	338.46	344.233	363.738	377.782	386.209	363.114	359.37	377.939	362.489	381.527	392.294	384.024	380.279	399.003	407.897	378.406	401.344	399.939	402.904	397.909	402.279	406.181	404.465	423.5	409.768	419.756	431.926	444.565	430.677	428.182	443.005	442.693	437.545	446.749	456.423	451.119	447.218	452.837	456.579	472.807	474.835	493.248	478.581	494.965	479.363	491.843	497.15	501.05
	48	415.101	414.431	434.324	424.462	449.207	423.124	428.976	470.773	442.685	478.462	444.858	457.565	453.385	460.407	478.464	466.926	472.109	471.439	493.674	485.651	483.98	506.883	497.355	510.894	511.899	514.908	514.239	532.962	541.321	524.269	546.34	523.935	551.519	568.909	585.791	553.025	559.712	570.913	568.573	584.455	584.286	602.511	616.721	618.226	621.235	617.389	629.594	639.959
	49	364.287	369.806	389.699	368.801	394.214	386.354	400.064	419.624	394.715	408.924	400.733	412.435	412.603	393.544	404.745	410.597	420.794	411.265	446.374	429.824	441.525	433.501	440.188	483.488	443.197	454.064	473.29	461.755	461.92	452.059	466.602	464.596	477.469	498.2	492.849	473.289	498.366	508.734	492.181	511.742	526.789	535.649	538.825	520.768	543.674	528.961	550.696	551.531
	50	380.639	387.193	392.812	401.704	404.045	404.825	405.137	415.121	391.407	431.509	412.001	445.396	429.947	431.819	445.081	437.749	436.343	459.282	456.629	462.714	434.005	462.713	474.572	494.39	489.24	497.511	489.552	515.298	504.531	499.382	502.66	492.205	513.269	517.637	536.207	509.993	534.647	541.669	539.951	527.782	561.173	569.131	585.359	563.825	570.223	566.009	583.485	595.656
FUJI APPLE (B)	1	351.67	318.9	337.62	372.73	400.82	431.24	461.67	403.16	405.5	361.03	475.71	332.94	384.43	342.3	478.05	398.48	365.71	372.73	417.2	442.95	389.11	405.5	358.69	407.84	365.71	464.01	435.92	466.35	424.22	468.69	421.88	461.67	449.97	403.16	442.95	445.29	464.01	405.5	480.39	438.27	503.8	510.82	503.8	412.52	478.05	459.33	466.35	534.23
	2	350.79	339.09	381.21	383.56	411.64	378.87	390.58	388.24	313.34	446.75	390.58	406.96	381.21	435.05	418.66	362.49	392.92	406.96	446.75	385.9	383.56	413.98	467.81	343.77	381.21	332.06	463.13	402.28	350.79	446.75	336.74	435.05	402.28	432.71	451.43	470.16	432.71	343.77	446.75	488.88	399.94	442.07	453.77	519.31	491.22	470.16	453.77	460.79
	3	366.88	390.28	432.41	469.86	401.99	376.24	385.6	418.37	420.71	401.99	411.35	406.67	357.52	427.73	343.47	441.78	479.22	430.07	455.82	469.86	397.31	409.01	427.73	437.1	448.8	453.48	500.29	535.4	411.35	472.2	369.22	397.31	486.25	409.01	523.69	530.72	488.59	453.48	434.75	469.86	519.01	467.52	507.31	542.42	462.84	495.61	497.95	540.08
	4	416.62	367.46	376.83	479.81	416.62	430.66	503.22	423.64	400.23	456.4	402.57	479.81	395.55	458.75	395.55	519.6	437.68	517.26	517.26	442.36	468.11	550.03	512.58	477.47	510.24	498.53	526.62	514.92	491.51	477.47	571.09	512.58	554.71	564.07	594.5	613.22	594.5	568.75	585.13	587.47	636.63	575.77	592.16	641.31	648.33	575.77	629.6	627.26
	5	354.88	413.4	389.99	389.99	415.74	399.35	418.08	455.53	446.16	483.61	439.14	478.93	455.53	411.06	411.06	411.06	530.42	492.98	476.59	471.91	523.4	455.53	586.6	525.74	542.13	593.62	558.51	565.53	492.98	553.83	553.83	577.23	546.81	553.83	544.47	600.64	525.74	560.85	626.39	628.73	588.94	631.07	661.49	614.68	642.77	659.15	635.75	703.62
	6	415.59	422.61	462.4	541.98	499.85	427.29	457.72	460.06	427.29	413.25	504.53	478.79	518.57	485.81	467.08	483.47	506.87	520.92	549	516.23	534.96	556.02	516.23	539.64	579.43	556.02	567.73	591.13	574.75	584.11	591.13	574.75	619.22	567.73	628.58	691.77	670.71	689.43	696.46	663.69	684.75	666.03	729.22	682.41	668.37	701.14	703.48	701.14
	7	410.18	379.75	335.28	321.24	442.95	332.94	393.8	358.69	398.48	330.6	344.64	368.05	325.92	358.69	372.73	382.09	368.05	351.67	386.77	433.58	428.9	421.88	379.75	375.07	354.01	384.43	396.14	384.43	400.82	435.92	447.63	433.58	438.27	440.61	405.5	447.63	464.01	428.9	454.65	440.61	471.03	417.2	513.16	475.71	438.27	464.01	428.9	492.1
	8	448.51	432.12	462.55	474.25	490.63	408.72	397.01	460.21	528.08	549.15	490.63	441.48	467.23	478.93	556.17	523.4	579.58	560.85	488.29	584.26	537.45	516.38	600.64	507.02	539.79	602.98	574.89	581.92	530.42	602.98	570.21	598.3	565.53	544.47	663.83	621.7	631.07	619.36	577.23	617.02	621.7	617.02	743.41	694.26	703.62	645.11	720.01	682.56
	9	404.33	369.22	369.22	359.86	376.24	385.6	467.52	392.62	357.52	378.58	418.37	387.94	394.97	343.47	378.58	394.97	425.39	376.24	364.54	434.75	371.56	420.71	366.88	411.35	404.33	437.1	472.2	441.78	399.65	476.88	411.35	418.37	502.63	488.59	493.27	418.37	511.99	479.22	455.82	462.84	495.61	486.25	441.78	476.88	495.61	476.88	460.5	476.88
	10	441.92	381.07	397.45	364.68	472.35	376.39	409.15	343.62	484.05	392.77	399.79	392.77	418.52	413.84	458.31	385.75	360	402.13	430.22	397.45	413.84	427.88	423.2	383.41	425.54	479.37	477.03	432.56	404.47	439.58	477.03	376.39	402.13	465.33	453.63	493.41	418.52	411.5	367.03	430.22	565.97	467.67	493.41	523.84	512.14	523.84	491.07	484.05
	11	386.63	384.29	381.95	445.14	410.03	424.08	400.67	405.35	426.42	473.23	395.99	405.35	449.82	381.95	367.9	449.82	381.95	417.05	496.63	435.78	414.71	447.48	456.84	426.42	473.23	468.55	449.82	484.93	405.35	398.33	435.78	414.71	487.27	520.04	477.91	470.89	405.35	435.78	468.55	438.12	494.29	513.02	498.97	473.23	520.04	529.4	513.02	522.38
	12	344.94	351.96	410.47	433.88	347.28	333.23	380.04	370.68	436.22	431.54	398.77	424.51	454.94	401.11	368.34	387.07	398.77	438.56	408.13	438.56	382.39	410.47	457.28	466.64	433.88	459.62	398.77	417.49	504.09	433.88	436.22	408.13	445.58	508.77	410.47	454.94	506.43	508.77	511.11	431.54	457.28	490.05	487.71	440.9	550.9	506.43	508.77	483.03
	13	400.52	367.76	391.16	407.55	402.86	426.27	496.49	442.65	440.31	416.91	400.52	498.83	484.78	435.63	484.78	515.21	489.46	466.06	515.21	440.31	442.65	480.1	512.87	573.72	477.76	543.3	519.89	608.83	545.64	494.15	519.89	526.91	620.53	536.28	613.51	547.98	592.45	573.72	566.7	646.28	622.88	695.43	625.22	622.88	613.51	676.71	634.58	665
	14	382.24	443.09	407.98	375.22	431.39	393.94	461.82	424.37	419.69	440.75	429.05	419.69	515.65	426.71	400.96	468.84	480.54	473.52	517.99	473.52	482.88	485.22	464.16	473.52	506.29	501.61	529.69	466.5	496.92	581.18	599.91	562.46	567.14	560.12	567.14	553.1	585.87	529.69	630.34	620.97	649.06	700.55	646.72	733.32	574.16	649.06	576.5	665.44
	15	534.37	494.58	485.22	506.29	508.63	496.92	564.8	506.29	532.03	475.86	576.5	496.92	581.18	487.56	522.67	541.4	571.82	553.1	557.78	534.37	555.44	569.48	595.23	599.91	642.04	644.38	623.31	653.74	597.57	646.72	583.52	672.47	646.72	730.98	667.78	677.15	695.87	611.61	702.89	667.78	705.23	738	691.19	738	728.64	719.28	759.06	749.7
	16	553.68	448.36	504.53	546.66	518.57	464.74	527.94	532.62	490.49	539.64	556.02	532.62	558.36	511.55	591.13	574.75	570.07	570.07	609.86	572.41	626.24	637.94	602.83	666.03	600.49	584.11	684.75	651.99	722.2	680.07	647.3	628.58	712.84	680.07	729.22	691.77	743.27	673.05	696.46	612.2	715.18	726.88	780.71	769.01	752.63	785.4	806.46	750.29
	17	371.27	366.59	322.12	397.01	357.22	415.74	312.75	422.76	387.65	359.56	397.01	380.63	406.38	387.65	378.29	387.65	418.08	347.86	406.38	471.91	425.1	361.91	448.51	411.06	406.38	455.53	443.82	436.8	441.48	450.85	446.16	418.08	394.67	490.63	413.4	434.46	471.91	490.63	413.4	462.55	460.21	476.59	570.21	467.23	471.91	516.38	476.59	432.12
	18	385.75	411.5	308.51	399.79	369.37	348.3	423.2	367.03	406.81	334.26	381.07	341.28	371.71	425.54	451.28	460.65	430.22	350.64	427.88	423.2	395.11	381.07	423.2	395.11	441.92	448.94	455.97	397.45	444.26	446.6	502.78	448.94	453.63	413.84	434.9	402.13	495.75	439.58	432.56	488.73	416.18	467.67	474.69	467.67	409.15	448.94	470.01	509.8
	19	333.97	345.67	331.62	355.03	371.41	387.8	336.31	413.54	364.39	397.16	399.5	439.29	434.61	343.33	387.8	369.07	390.14	348.01	420.57	329.28	399.5	418.22	359.71	366.73	413.54	399.5	418.22	479.08	406.52	474.4	488.44	455.67	434.61	425.25	497.8	446.31	315.24	481.42	450.99	429.93	509.51	439.29	446.31	500.14	439.29	448.65	528.23	450.99
	20	339.09	339.09	364.83	355.47	350.79	353.13	432.71	402.28	327.38	367.17	390.58	341.43	296.96	381.21	350.79	306.32	346.11	369.51	388.24	423.34	409.3	364.83	406.96	430.37	332.06	339.09	360.15	362.49	378.87	371.85	406.96	458.45	479.52	474.84	432.71	399.94	444.41	451.43	428.03	526.33	406.96	446.75	474.84	439.73	437.39	449.09	458.45	493.56
	21	305	347.13	372.88	328.41	370.54	349.47	412.67	436.07	363.51	326.07	398.62	417.35	349.47	438.41	464.16	424.37	368.2	457.14	447.77	340.11	426.71	393.94	344.79	461.82	438.41	445.43	422.03	445.43	433.73	508.63	452.45	466.5	468.84	407.98	510.97	436.07	464.16	496.92	508.63	536.71	534.37	510.97	520.33	466.5	529.69	492.24	436.07	590.55
	22	357.37	462.69	399.5	411.2	399.5	422.91	441.63	495.46	411.2	443.97	413.54	467.38	420.57	502.48	483.76	458.01	490.78	429.93	425.25	500.14	486.1	481.42	472.06	500.14	483.76	568.02	551.64	500.14	600.79	556.32	558.66	523.55	497.8	584.4	535.25	568.02	563.34	563.34	551.64	638.23	570.36	619.51	628.87	649.94	612.49	628.87	631.21	701.43
	23	487.71	429.2	492.39	527.5	550.9	525.16	511.11	515.8	499.41	487.71	478.35	513.46	546.22	562.61	553.24	464.3	590.69	527.5	548.56	564.95	543.88	501.75	625.8	588.35	593.03	628.14	567.29	618.78	660.91	534.52	597.71	562.61	665.59	660.91	684.31	644.53	644.53	621.12	681.97	672.61	674.95	656.23	703.04	728.78	670.27	707.72	679.63	726.44
	24	428.46	383.99	428.46	458.89	484.64	456.55	472.93	531.45	468.25	496.34	503.36	510.38	456.55	505.7	451.87	479.96	437.83	545.49	552.51	559.53	524.43	557.19	454.21	575.92	585.28	582.94	543.15	510.38	543.15	622.73	575.92	561.87	578.26	643.79	543.15	557.19	503.36	615.71	699.97	669.54	723.37	678.9	674.22	601.66	697.63	613.37	695.29	763.16
	25	397.89	367.46	418.96	463.43	362.78	351.08	404.91	365.12	367.46	379.17	437.68	433	402.57	468.11	418.96	344.06	386.19	374.49	402.57	477.47	500.87	421.3	451.72	379.17	407.25	423.64	503.22	493.85	407.25	498.53	512.58	463.43	463.43	440.02	507.9	461.09	475.13	475.13	491.51	503.22	533.64	521.94	559.39	535.98	533.64	491.51	554.71	580.45
	26	452.45	487.56	489.9	471.18	501.61	452.45	424.37	426.71	508.63	424.37	457.14	478.2	482.88	506.29	578.84	569.48	464.16	431.39	576.5	543.74	520.33	529.69	487.56	569.48	539.05	534.37	557.78	649.06	578.84	539.05	604.59	567.14	604.59	592.89	604.59	578.84	555.44	576.5	585.87	604.59	627.99	611.61	632.68	604.59	623.31	583.52	712.25	684.17
	27	524.28	407.25	538.32	519.6	500.87	533.64	489.17	421.3	472.79	510.24	505.56	545.34	521.94	493.85	559.39	440.02	543	589.81	557.05	580.45	517.26	505.56	521.94	557.05	596.84	505.56	585.13	596.84	610.88	554.71	575.77	585.13	655.35	622.58	559.39	585.13	613.22	662.37	615.56	664.71	664.71	617.9	692.8	711.52	688.12	660.03	713.86	732.59
	28	40.57	56.0167	53.2073	60.2287	77.5507	65.3773	66.6273	61.0093	82.6973	91.4373	56.7967	120.615	94.5573	95.3387	112.187	89.5633	85.1953	93.152	132.475	121.396	100.799	124.517	118.743	148.545	135.439	133.723	143.241	162.12	158.375	147.766	178.193	168.986	182.249	190.364	206.123	214.236	196.448	181.782	200.973	206.747	243.259	231.713	244.507	255.586	252.309	235.926	238.578	292.411
	29	52.5833	72.0887	80.358	80.2027	80.0453	50.088	60.5407	95.026	53.9887	107.977	77.8627	106.415	97.2107	103.763	99.394	93.4647	105.481	115.467	103.763	117.339	111.877	128.886	120.928	139.183	141.213	129.82	149.483	177.256	150.886	169.299	163.057	146.205	185.839	194.419	200.194	199.102	197.385	203.783	196.291	219.23	232.961	232.961	255.899	252.309	245.757	250.749	246.38	283.984
	30	100.955	112.192	119.836	129.667	151.666	122.331	141.057	163.993	155.411	163.369	153.695	178.505	175.697	170.235	193.171	173.824	174.606	187.243	216.265	210.961	199.881	220.947	218.45	218.762	207.371	219.074	237.954	257.613	255.43	258.239	272.126	266.821	277.587	295.843	315.038	287.418	294.907	318.625	304.113	320.499	333.761	355.138	365.28	356.229	342.498	345.463	342.031	403.663
	31	14.1987	32.4553	29.8027	34.4827	34.6387	35.1087	30.4273	47.7467	40.8827	64.4427	39.788	78.486	47.746	63.662	64.1307	54.924	46.6553	74.1173	86.9107	84.1013	91.5933	98.7713	104.231	122.801	99.708	110.005	105.481	141.367	138.247	117.496	138.092	128.729	145.425	166.645	167.737	131.539	157.129	175.073	157.128	155.411	184.902	216.891	209.244	201.129	199.568	189.895	221.727	255.273
	32	4.97375	11.1169	13.0188	11.5556	24.5744	15.3594	11.7031	34.5231	29.9881	27.5019	30.2806	38.4725	33.4988	35.4	61	35.1075	26.0381	45.4944	61.2944	40.8125	55.1481	61.5844	55.88	75.0431	57.0506	74.1656	78.1169	110.005	86.6006	79.14	97.57	95.815	119.368	107.812	132.533	129.609	128.729	117.903	131.071	141.31	147.161	181.392	187.097	172.321	177.003	158.718	186.366	193.388
	33	22.0007	34.0153	14.9793	27.618	29.6473	32.7673	32.4547	59.9173	36.3573	59.4493	46.654	55.392	49.9307	46.9667	59.294	51.9593	55.2353	56.6413	88.316	81.9187	84.2587	82.5433	94.7133	110.628	105.479	71.62	100.799	128.419	116.559	105.011	128.105	119.524	136.375	148.235	157.439	137.157	163.369	163.837	124.828	149.014	167.425	201.441	204.095	185.527	187.399	191.299	205.655	240.452
	34	18.256	39.4767	30.74	37.448	44.4693	38.852	34.9527	49.6193	33.5467	69.9033	46.498	64.598	69.5927	80.514	85.9767	64.4427	64.754	87.068	110.005	108.288	100.643	102.358	108.913	119.991	97.6787	127.794	109.693	153.539	156.036	152.759	155.879	153.853	168.987	175.852	181.937	155.099	187.087	199.102	194.577	208.774	220.012	244.821	238.735	246.535	251.685	248.721	258.707	277.901
	35	24.81	38.8527	53.832	63.8193	75.21	65.6907	59.918	73.6493	62.8813	65.6913	74.7413	107.04	74.5847	87.3813	104.231	86.912	102.516	116.402	124.985	139.34	127.325	149.326	134.19	146.985	154.787	134.035	152.915	198.789	175.386	153.695	194.421	170.545	189.738	216.578	228.905	202.534	198.167	223.132	214.55	237.329	227.033	255.899	280.241	289.603	275.559	268.849	297.091	294.907
	36	25.3062	38.7656	41.105	51.0525	63.0481	48.1269	62.4637	81.04	57.7806	83.965	65.6825	94.3538	83.9669	67.73	88.2087	92.89	76.2131	84.2575	114.541	101.815	114.686	130.192	131.508	157.84	109.274	131.069	129.169	161.644	149.648	154.329	171.444	161.351	171.737	181.245	176.272	180.368	195.435	199.384	196.606	216.792	220.743	225.423	256.875	249.852	234.495	225.13	261.847	288.471
	37	76.77	94.402	109.537	97.8347	120.928	112.344	114.218	139.185	120.146	137.468	131.537	147.453	146.673	151.511	162.277	131.537	158.687	162.433	167.739	166.491	157.596	207.057	195.044	197.854	181.625	198.79	207.84	231.556	212.833	221.415	229.373	237.641	254.963	254.339	249.19	241.699	266.509	268.069	261.827	273.999	276.808	308.795	314.725	302.397	307.078	299.433	320.029	361.846
	38	59.4487	64.1307	63.038	67.5627	77.2373	85.5073	83.6353	88.0047	78.6413	114.686	105.637	109.069	86.756	122.8	136.375	106.104	110.786	109.225	129.509	123.424	113.282	148.389	156.659	176.632	144.646	153.225	149.326	180.844	188.178	171.327	191.144	196.293	204.095	196.918	202.221	196.605	198.322	216.421	213.925	208.463	228.904	251.529	246.849	256.991	258.863	252.153	258.863	272.438
	39	55.5869	75.4838	76.945	107.958	89.3794	85.5763	98.8875	100.937	102.546	103.861	125.365	125.95	117.32	123.756	141.309	128.729	105.033	133.702	153.597	150.965	148.916	147.162	166.324	175.832	165.885	170.566	165.447	222.351	198.651	193.972	210.5	196.605	221.181	223.521	234.931	205.09	245.756	254.534	221.912	242.831	260.824	284.959	275.891	290.079	298.565	310.121	294.467	331.479
	40	91.1338	100.057	106.057	105.763	127.998	109.42	117.027	128.29	120.829	146.869	135.459	154.181	148.039	145.552	162.52	159.594	149.502	150.233	186.071	167.933	176.564	181.978	178.173	190.169	179.929	169.103	211.525	206.991	218.255	207.722	228.641	221.912	238.441	251.315	257.019	241.076	253.657	255.851	273.11	258.044	269.602	298.418	314.51	274.428	297.249	301.929	312.024	320.799
	41	134.502	140.277	154.163	142.306	169.923	143.085	144.332	164.929	164.461	187.556	178.661	198.633	172.264	180.846	188.647	182.092	182.874	187.399	219.544	205.187	214.861	215.33	220.323	219.385	208.62	205.499	224.067	269.162	249.345	237.175	253.87	275.247	252.154	295.688	265.883	261.203	284.765	288.511	268.069	303.333	317.065	322.37	326.271	311.448	315.503	328.301	326.427	354.356
	42	185.681	180.064	190.519	198.789	210.492	198.323	208.308	219.385	214.548	219.854	214.236	244.507	208.307	240.451	265.885	219.073	229.061	265.417	259.642	268.694	256.367	259.955	276.807	295.374	278.056	270.098	290.539	322.213	305.361	291.476	309.263	288.198	328.611	336.413	329.704	321.276	348.739	340.938	338.285	361.534	350.924	380.883	382.601	362.471	369.337	369.649	385.409	411.467
	43	232.152	227.617	234.785	228.934	243.562	240.782	237.125	259.069	253.362	272.379	261.555	273.405	266.821	266.382	293.299	267.991	280.132	265.066	285.837	292.128	305.001	309.829	317.435	319.631	316.558	309.684	325.188	362.929	333.087	320.654	366.293	366.877	368.051	368.927	378.582	364.101	379.751	387.798	385.165	405.06	409.302	444.117	451.284	440.606	427.148	436.656	439.874	462.402
	44	239.515	258.708	252.935	250.595	279.773	261.827	263.7	286.327	298.184	296.781	304.581	315.817	302.553	308.64	324.243	315.036	310.824	318.625	332.045	341.874	325.959	344.682	343.277	360.911	354.357	349.989	371.834	390.869	387.126	390.715	386.189	386.345	404.757	419.892	445.171	409.126	422.232	455.625	419.581	431.595	457.964	454.221	460.929	469.669	451.411	478.561	500.25	510.549
	45	250.838	233.985	260.044	268.625	263.477	251.305	268.002	273.617	260.823	287.194	267.689	291.094	267.689	289.221	313.095	273.931	273.929	282.044	284.071	306.697	293.593	323.55	299.209	318.713	301.548	303.733	314.812	331.975	342.899	342.587	352.885	343.054	357.566	367.863	368.488	379.88	373.481	391.425	354.29	367.552	387.058	389.397	401.101	405.469	397.979	403.752	426.065	427.001
	46	221.799	247.546	226.344	230.061	250.851	229.098	234.191	259.801	258.56	253.054	241.763	268.611	260.626	269.711	287.61	278.25	261.452	271.778	310.604	286.509	288.437	291.603	305.647	319.828	301.242	314.596	318.451	340.479	344.885	330.016	354.661	343.645	362.645	362.37	369.804	353.007	384.124	381.232	396.378	400.232	397.891	407.391	423.913	410.971	411.659	405.326	429.421	469.484
	47	247.472	239.203	265.105	276.65	261.826	272.905	278.836	296.937	281.489	306.142	300.368	318.781	306.923	323.618	340.002	321.278	306.455	324.553	348.427	351.394	348.739	355.294	374.799	367.309	376.67	365.124	369.024	411.155	398.047	391.026	405.849	417.863	430.036	426.29	457.185	434.248	438.773	455.78	451.724	473.881	483.553	494.009	487.299	487.769	510.08	507.271	520.846	529.897
	48	217.661	226	233.604	239.751	254.085	232.434	253.208	270.47	257.741	271.639	261.107	282.903	282.025	275.882	288.17	288.023	283.488	306.016	308.356	314.061	301.92	319.329	334.396	324.886	309.379	339.222	332.785	355.752	358.824	343.758	363.067	368.626	383.108	386.179	389.983	386.619	392.177	397.443	408.999	400.222	426.846	429.918	446.886	424.067	441.181	423.335	440.157	473.803
	49	235.925	244.976	219.386	237.019	245.444	256.679	245.756	276.028	269.319	269.628	286.013	283.984	289.915	279.616	286.326	276.339	277.12	290.538	283.829	306.767	293.036	303.178	304.425	330.171	314.88	309.264	333.917	350.925	332.669	327.519	348.115	357.324	374.174	364.343	372.614	361.223	388.218	377.451	374.331	369.804	400.232	415.366	412.403	403.509	419.111	412.091	430.815	450.163
	50	253.466	277.422	281.139	304.957	300.139	283.067	286.372	299.451	305.095	313.495	302.755	298.902	321.066	322.031	352.457	338.827	313.494	334.696	360.581	352.732	352.045	366.776	384.536	383.16	389.493	371.319	384.673	397.753	400.506	397.341	410.281	420.056	443.325	445.114	442.912	434.65	455.854	459.984	463.839	467.418	483.804	496.88	499.772	521.664	494.404	502.527	508.584	548.786
Red Star (A)	1	517.444	529.614	530.083	534.919	529.615	541.163	561.757	558.324	557.077	592.965	572.057	575.957	591.717	570.495	619.803	600.768	618.868	613.717	632.131	638.061	647.109	631.817	652.259	668.955	653.038	670.359	709.992	708.275	697.665	680.814	725.594	716.233	752.903	750.405	758.675	750.561	776.307	774.591	755.553	791.599	781.146	833.885	823.741	812.662	828.424	829.047	846.991	865.403
	2	409.38	417.18	432.472	426.387	436.373	434.034	444.331	440.431	436.374	463.524	445.578	454.786	463.992	476.787	488.488	473.666	481.156	486.773	508.618	490.049	507.837	507.37	522.973	546.066	537.953	531.088	539.045	568.067	551.996	568.848	581.331	575.869	590.068	597.558	609.261	613.161	612.383	625.644	628.141	619.56	624.707	664.185	672.611	670.271	663.249	676.825	697.109	720.828
	3	418.167	426.279	458.111	452.496	461.387	454.367	451.869	474.339	471.218	483.389	492.595	488.693	499.459	493.376	520.994	518.497	526.922	520.213	524.427	528.639	541.591	561.717	542.995	569.363	585.125	565.462	574.201	595.736	599.479	593.861	620.076	612.743	614.927	652.532	647.069	623.353	657.525	657.369	659.398	665.013	697.469	692.165	730.081	700.434	720.875	725.712	739.755	760.04
	4	432.638	457.604	468.683	457.449	473.208	456.667	468.682	489.904	486.159	514.557	489.28	518.459	499.733	501.295	512.06	515.649	530.472	533.594	555.751	549.197	541.706	558.559	557.467	563.396	576.346	570.573	590.393	609.739	610.831	610.831	617.383	604.901	625.343	650.465	654.832	640.321	656.706	659.047	644.691	669.033	696.963	703.829	724.269	719.431	718.027	745.333	738.157	768.428
	5	454.244	459.751	474.622	485.085	489.627	469.252	472.969	491.694	495.135	508.766	504.634	537.54	511.106	516.062	526.939	538.504	538.917	540.018	563.149	566.59	564.8	570.996	576.503	604.175	580.772	595.228	597.156	643.691	619.184	617.531	655.806	631.712	663.515	667.508	668.885	658.009	673.842	699.589	676.871	716.521	703.582	726.849	745.847	755.211	757.964	743.919	758.24	796.101
	6	407.409	403.509	410.998	414.119	412.402	399.919	424.886	431.907	426.603	437.369	449.383	487.768	447.199	469.669	490.889	479.808	489.797	485.271	502.747	495.257	503.215	528.493	542.068	552.053	555.489	528.806	543.316	579.671	571.715	568.283	587.007	568.751	591.062	602.143	610.723	623.519	647.859	648.953	629.603	651.761	675.323	672.983	686.089	687.494	691.082	716.673	708.403	722.134
	7	377.971	391.601	391.739	405.369	406.745	399.998	399.037	424.78	428.086	413.079	427.397	431.251	435.934	449.013	452.317	429.737	435.108	449.425	477.375	472.005	481.504	492.519	496.375	490.729	495.273	506.15	518.816	520.468	518.954	514.135	544.286	533.272	545.525	549.793	574.988	550.069	568.105	588.068	568.932	580.358	582.836	616.017	635.431	614.504	609.546	623.726	650.986	657.735
	8	449.456	460.49	475.036	487.741	492.589	484.563	479.382	516.161	511.649	514.322	508.804	528.365	534.049	550.601	547.592	528.03	549.597	550.265	578.687	573.839	569.659	597.076	624.661	623.491	637.702	621.987	619.479	663.615	645.726	637.2	677.825	694.71	704.909	713.937	727.144	706.08	718.616	725.471	710.258	746.036	747.706	770.444	775.125	773.787	798.361	795.854	818.925	834.811
	9	424.417	418.487	421.764	419.891	442.829	424.886	441.737	441.893	448.134	460.929	466.079	484.959	462.801	491.043	489.951	473.257	472.476	511.485	520.692	514.917	514.761	533.019	534.89	538.323	528.647	554.395	562.664	587.006	573.589	566.098	599.645	601.516	605.107	586.539	616.028	613.533	611.192	615.872	616.341	646.457	641.776	668.145	673.138	687.649	682.813	675.79	681.097	704.501
	10	374.203	393.084	399.013	394.956	416.333	433.652	425.695	428.815	428.035	445.045	453.781	462.675	439.27	455.811	479.683	468.449	461.895	471.101	480.775	481.711	494.506	499.5	503.713	501.683	501.371	493.102	510.422	549.119	521.657	528.365	544.749	565.814	587.193	555.517	594.213	561.446	578.609	586.567	591.873	601.234	634.783	645.237	636.968	643.52	656.627	646.018	663.961	680.033
	11	449.909	462.392	472.535	465.981	470.505	478.775	477.685	505.458	483.145	506.239	499.529	531.517	505.147	527.147	558.823	515.757	530.892	561.319	567.406	568.965	561.163	579.263	596.583	616.4	593.777	596.739	616.087	641.834	622.173	648.854	652.599	666.487	679.595	670.076	693.013	676.786	694.418	704.871	707.836	720.631	728.746	762.917	750.433	780.549	752.307	776.492	767.754	804.423
	12	467.043	462.674	486.706	506.676	518.225	494.509	504.492	509.643	496.066	555.829	498.565	571.901	538.663	561.602	559.883	560.509	562.694	564.567	594.837	603.888	629.478	624.64	639.776	647.421	656.315	662.558	665.833	686.274	691.424	684.558	702.813	735.425	729.651	749.625	774.746	753.214	781.456	775.995	778.179	790.195	804.393	792.534	841.217	847.46	872.114	859.317	868.212	904.099
	13	362.573	367.985	350.139	375.445	377.931	379.103	383.491	380.566	394.317	384.663	382.467	429.426	410.993	424.305	418.014	404.556	421.964	411.871	448.88	437.031	450.489	438.494	442.151	481.207	468.628	486.621	479.307	504.76	469.359	493.496	521.436	493.789	514.999	533.723	534.602	530.361	537.674	545.574	542.062	573.952	564.443	609.499	599.406	612.132	610.377	621.347	631.003	655.139
	14	370.791	408.862	407.458	400.437	417.755	403.559	412.139	432.267	409.331	419.94	426.338	444.438	450.056	451.617	460.511	449.119	469.404	474.242	468.622	492.341	493.121	504.198	497.335	515.279	500.455	512.471	527.606	550.697	534.315	516.371	553.197	540.088	565.991	590.332	584.558	567.239	590.643	598.759	584.403	615.453	642.447	660.55	662.263	670.846	659.923	652.279	683.641	692.223
	15	465.585	477.577	491.621	509.762	506.396	502.009	498.204	522.341	503.909	556.572	514.881	540.627	532.289	541.504	559.937	553.794	552.331	553.063	592.704	591.096	595.923	585.244	606.601	609.966	590.51	612.746	621.521	648.146	618.45	649.317	657.946	680.765	652.387	655.022	678.72	665.554	683.548	708.121	698.759	716.169	722.897	739.865	748.934	755.809	762.1	760.636	760.637	788.433
	16	451.538	463.084	478.064	485.865	506.463	510.677	491.013	526.903	509.896	540.009	510.987	555.769	536.577	535.173	584.481	543.287	545.785	575.585	586.197	590.721	589.786	605.077	623.958	635.972	625.985	619.277	642.525	649.391	669.832	672.798	696.203	678.413	695.734	688.713	721.168	732.713	733.339	730.687	753.155	754.559	767.199	791.852	801.526	787.64	805.273	804.645	817.911	849.117
	17	495.775	497.179	502.641	527.295	544.613	515.903	518.866	545.55	541.805	564.899	553.507	582.373	558.657	556.316	611.865	587.367	580.189	605.623	610.617	617.325	620.135	622.164	644.165	666.477	670.691	647.286	663.981	675.683	684.89	670.535	701.43	730.92	742.621	733.729	744.028	730.608	765.559	771.489	771.023	803.634	789.901	802.697	819.549	820.64	825.947	824.853	835.933	876.189
	18	413.378	426.329	412.598	439.747	438.187	429.761	441.619	449.578	443.18	474.076	470.799	480.161	461.905	463.465	489.211	478.601	480.94	502.317	513.084	507.624	509.807	514.177	521.665	528.687	524.163	514.645	544.448	551.001	555.838	549.597	553.498	562.236	569.727	595.629	592.663	588.137	595.628	589.541	609.67	616.382	627.458	650.241	652.425	644.467	623.089	658.823	658.822	674.269
	19	419.772	424.786	451.869	461.566	475.109	448.19	464.743	490.155	492.16	516.569	504.198	521.082	517.571	536.296	571.571	526.433	538.471	538.135	569.564	562.376	582.104	605.174	614.703	596.315	596.647	607.014	619.552	644.128	631.255	637.441	650.312	673.386	687.26	699.634	691.941	702.975	717.521	731.063	717.52	728.054	762.325	772.524	784.224	800.276	791.581	809.136	814.486	819.835
	20	347.57	356.93	359.27	338.21	392.04	317.14	392.04	385.02	380.34	385.02	361.61	373.32	392.04	345.23	312.46	434.17	401.4	434.17	448.21	417.79	431.83	399.06	466.94	378	427.15	417.79	415.45	392.04	424.81	373.32	455.23	438.85	459.92	466.94	424.81	415.45	471.62	396.72	469.28	518.43	483.32	490.34	476.3	438.85	485.66	583.96	464.6	490.34
	21	638.82	599.03	589.67	666.91	655.2	613.07	643.5	617.76	694.99	664.57	641.16	676.27	669.25	620.1	711.38	697.33	666.91	711.38	774.57	760.53	776.91	786.27	746.48	837.77	788.61	816.7	912.66	837.77	854.15	872.87	872.87	842.45	865.85	900.96	872.87	844.79	807.34	896.28	912.66	959.47	1015.65	1017.99	952.45	961.81	931.39	954.79	933.73	1074.16
	22	608.1	612.78	647.89	697.04	601.08	643.21	580.01	671.29	664.27	680.66	685.34	664.27	760.24	690.02	685.34	781.3	701.72	788.32	757.89	771.94	720.45	778.96	762.58	809.39	692.36	755.55	860.88	881.94	853.86	837.47	879.6	842.15	851.52	881.94	849.18	870.24	893.65	891.31	973.22	907.69	893.65	1003.65	1052.8	928.75	917.05	954.5	1038.76	921.73
	23	549.44	605.61	577.53	600.93	622	657.11	685.19	671.15	692.21	682.85	598.59	622	598.59	640.72	713.28	626.68	703.92	703.92	647.74	694.55	722.64	694.55	776.47	724.98	722.64	760.09	790.52	797.54	846.69	741.36	842.01	842.01	834.99	827.96	905.2	888.82	900.52	839.67	884.14	858.39	886.48	952.01	914.56	900.52	893.5	912.22	1036.27	982.44
	24	385.9	406.96	430.37	388.24	362.49	430.37	463.13	369.51	395.26	381.21	353.13	428.03	463.13	369.51	360.15	397.6	451.43	411.64	383.56	474.84	456.11	432.71	484.2	477.18	449.09	444.41	587.18	542.71	453.77	474.84	552.07	523.99	605.91	474.84	561.44	538.03	533.35	568.46	535.69	568.46	549.73	554.41	533.35	523.99	563.78	580.16	589.52	601.23
	25	421.15	430.51	407.11	439.87	411.79	364.98	416.47	435.19	449.24	463.28	418.81	393.06	383.7	425.83	442.21	477.32	418.81	386.04	491.37	463.28	479.66	397.74	439.87	470.3	510.09	505.41	514.77	498.39	552.22	500.73	479.66	533.5	470.3	493.71	538.18	592.01	599.03	556.9	570.94	538.18	491.37	545.2	566.26	599.03	624.78	608.39	617.76	655.2
	26	342.16	391.31	379.61	405.35	438.12	477.91	482.59	403.01	447.48	482.59	410.03	445.14	445.14	447.48	475.57	477.91	491.95	484.93	491.95	428.76	555.15	487.27	484.93	510.68	463.86	527.06	566.85	529.4	548.12	510.68	562.17	543.44	639.41	590.25	613.66	667.49	590.25	672.17	569.19	613.66	618.34	683.88	679.19	676.85	651.11	674.51	646.43	658.13
	27	521.79	510.09	458.6	526.47	559.24	531.16	517.11	606.05	547.54	573.28	500.73	587.33	556.9	570.94	629.46	587.33	673.93	613.07	685.63	643.5	608.39	711.38	575.63	673.93	617.76	713.72	659.88	746.48	685.63	753.51	762.87	744.14	797.98	779.25	797.98	702.01	861.17	837.77	795.64	863.51	767.55	835.42	828.4	807.34	907.98	840.11	854.15	966.49
	28	567.29	607.08	567.29	504.09	539.2	614.1	609.42	543.88	604.74	707.72	644.53	604.74	658.57	639.84	670.27	625.8	609.42	703.04	726.44	742.83	745.17	707.72	752.19	777.94	848.15	712.4	777.94	752.19	696.02	775.6	780.28	836.45	850.49	817.72	873.9	806.02	885.6	801.34	766.23	794.32	873.9	906.67	897.3	845.81	878.58	927.73	852.83	1023.69
	29	546.52	600.35	588.64	579.28	504.39	509.07	583.96	614.39	560.56	656.52	705.67	717.37	698.65	672.9	668.22	677.59	691.63	698.65	731.42	736.1	733.76	717.37	752.48	715.03	761.84	693.97	782.91	747.8	717.37	724.4	806.31	787.59	775.89	876.53	778.23	857.81	921	818.02	803.97	892.91	820.36	942.07	885.89	935.04	918.66	930.36	913.98	949.09
	30	593.33	581.62	626.09	565.24	602.69	579.28	616.73	600.35	607.37	682.27	656.52	628.43	647.16	614.39	656.52	637.8	679.93	696.31	686.95	595.67	724.4	649.5	733.76	693.97	719.71	731.42	726.74	811	726.74	651.84	759.5	796.95	792.27	818.02	811	892.91	832.06	806.31	787.59	860.15	808.66	942.07	923.34	876.53	977.17	878.87	871.85	942.07
	31	572.55	525.74	528.08	509.36	631.07	640.43	633.41	649.79	619.36	652.13	610	642.77	668.52	605.32	729.37	720.01	684.9	600.64	710.65	750.43	743.41	691.92	736.39	722.35	680.22	734.05	738.73	804.27	776.18	815.97	743.41	806.61	862.78	825.33	741.07	832.35	860.44	820.65	837.03	862.78	874.48	900.23	940.02	867.46	890.87	944.7	989.17	895.55
	32	566.7	569.04	620.53	622.88	597.13	545.64	625.22	620.53	585.43	597.13	700.11	650.96	662.66	653.3	700.11	622.88	732.88	657.98	629.9	711.82	657.98	693.09	763.31	744.58	660.32	672.03	763.31	751.6	730.54	695.43	786.71	798.42	854.59	849.91	831.18	807.78	849.91	870.97	782.03	908.42	854.59	889.7	866.29	896.72	889.7	936.51	927.14	927.14
	33	581.33	635.16	583.67	541.54	543.88	595.37	642.18	593.03	602.4	703.04	651.55	710.06	684.31	614.1	719.42	653.89	691.34	738.15	733.47	721.76	799	724.1	735.81	768.57	829.43	810.7	803.68	810.7	822.41	777.94	852.83	714.74	845.81	894.96	890.28	822.41	890.28	904.32	815.38	955.82	876.24	904.32	958.16	894.96	927.73	890.28	986.24	983.9
	34	490.78	467.38	535.25	544.61	516.53	514.19	532.91	563.34	507.16	532.91	568.02	516.53	539.93	603.13	612.49	619.51	661.64	586.74	626.53	642.92	603.13	624.19	542.27	659.3	649.94	715.47	652.28	642.92	666.32	626.53	701.43	663.98	745.9	682.71	766.96	642.92	699.09	788.03	750.58	785.69	816.12	809.09	830.16	893.35	830.16	781.01	816.12	811.43
	35	375.8	401.55	410.91	431.98	359.42	401.55	394.53	415.59	378.14	434.32	436.66	352.4	439	389.85	523.26	408.57	422.61	424.95	403.89	431.98	380.48	380.48	497.51	448.36	401.55	462.4	511.55	469.42	534.96	453.04	502.19	467.08	499.85	541.98	549	492.83	520.92	546.66	549	504.53	570.07	621.56	527.94	581.77	623.9	621.56	630.92	588.79
	36	382.97	441.48	492.98	429.78	436.8	504.68	420.42	457.87	467.23	481.27	460.21	467.23	408.72	553.83	464.89	478.93	460.21	518.72	497.66	521.06	474.25	558.51	490.63	602.98	602.98	546.81	570.21	600.64	551.49	544.47	567.87	647.45	661.49	579.58	546.81	663.83	631.07	542.13	663.83	652.13	677.88	743.41	727.03	670.86	729.37	682.56	661.49	811.29
	37	355.47	392.92	362.49	378.87	381.21	435.05	376.53	430.37	397.6	411.64	444.41	383.56	439.73	449.09	470.16	395.26	449.09	516.97	446.75	502.92	509.94	474.84	526.33	535.69	439.73	409.3	519.31	526.33	573.14	505.26	509.94	509.94	605.91	514.63	559.1	561.44	645.7	547.39	523.99	612.93	542.71	603.57	631.65	633.99	582.5	603.57	549.73	608.25
	38	461.52	426.42	459.18	445.14	442.8	452.16	484.93	487.27	438.12	480.25	466.21	517.7	424.08	517.7	541.1	461.52	515.36	496.63	529.4	557.49	440.46	548.12	515.36	646.43	555.15	522.38	552.81	578.55	616	594.93	590.25	620.68	639.41	655.79	660.47	601.96	672.17	637.06	613.66	740.05	655.79	711.96	697.92	768.13	674.51	716.64	730.69	749.41
	39	454.21	494	341.86	484.64	456.55	461.23	391.02	433.15	484.64	475.28	440.17	456.55	454.21	503.36	531.45	494	486.98	510.38	564.22	456.55	505.7	503.36	571.24	550.17	587.62	615.71	611.03	667.2	599.32	596.98	662.52	625.07	660.18	566.56	625.07	643.79	718.69	671.88	629.75	601.66	744.44	678.9	777.2	723.37	760.82	751.46	746.78	718.69
	40	530.86	495.75	544.91	512.14	484.05	537.88	542.57	577.67	521.5	594.06	645.55	561.29	565.97	584.7	668.95	610.44	617.46	610.44	619.8	683	612.78	654.91	699.38	652.57	692.36	743.85	713.42	743.85	741.51	802.36	767.26	764.92	697.04	706.4	746.19	739.17	753.21	865.56	830.45	851.52	846.84	842.15	837.47	895.99	886.62	921.73	870.24	945.14
	41	480.54	522.67	529.69	513.31	522.67	567.14	548.42	627.99	515.65	583.52	550.76	616.29	599.91	611.61	618.63	602.25	571.82	672.47	658.42	681.83	677.15	695.87	691.19	723.96	684.17	693.53	742.68	698.21	667.78	761.41	824.6	840.98	787.15	840.98	866.73	768.43	787.15	864.39	899.5	901.84	805.88	906.52	918.22	894.82	913.54	918.22	873.75	890.13
	42	585.28	517.4	529.11	604	629.75	571.24	568.9	604	618.05	674.22	632.09	681.24	536.13	592.3	664.86	629.75	629.75	732.73	711.67	784.23	749.12	763.16	751.46	716.35	695.29	774.86	779.54	758.48	781.89	760.82	767.84	802.95	732.73	880.19	861.46	833.38	831.04	863.8	856.78	849.76	908.27	990.19	891.89	903.59	835.72	929.34	983.17	966.79
	43	478.79	553.68	574.75	567.73	518.57	605.17	483.47	490.49	420.27	549	577.09	614.54	635.6	560.7	556.02	628.58	586.45	560.7	579.43	651.99	691.77	659.01	635.6	684.75	722.2	670.71	673.05	717.52	759.65	722.2	705.82	726.88	780.71	822.84	848.59	752.63	893.06	916.47	867.31	895.4	857.95	895.4	916.47	841.57	923.49	996.04	939.87	946.89
	44	428.17	388.38	444.56	435.19	472.64	411.79	430.51	418.81	423.49	559.24	458.6	547.54	482	531.16	570.94	472.64	465.62	479.66	505.41	489.03	510.09	563.92	542.86	582.65	575.63	540.52	601.37	624.78	587.33	666.91	657.54	702.01	638.82	671.59	694.99	713.72	690.31	739.46	673.93	734.78	746.48	685.63	725.42	687.97	711.38	783.93	809.68	842.45
	45	459.04	430.95	526.91	515.21	543.3	491.81	475.42	501.17	444.99	540.96	456.7	592.45	529.25	578.4	564.36	627.56	674.37	555	566.7	545.64	632.24	639.26	676.71	693.09	665	697.77	676.71	641.6	686.07	735.22	650.96	725.86	749.26	739.9	789.05	753.95	805.44	772.67	725.86	803.1	777.35	742.24	863.95	856.93	938.85	814.8	866.29	903.74
	46	515.21	562.02	501.17	562.02	583.09	540.96	559.68	629.9	620.53	585.43	627.56	571.38	618.19	683.73	650.96	697.77	643.94	634.58	763.31	643.94	730.54	688.41	800.76	828.84	807.78	786.71	716.5	817.14	782.03	793.73	824.16	842.89	859.27	875.65	866.29	917.78	948.21	849.91	880.33	885.02	877.99	903.74	992.68	943.53	997.36	1006.72	976.3	1074.6
	47	530.42	474.25	469.57	553.83	546.81	516.38	474.25	544.47	542.13	588.94	478.93	584.26	591.28	610	556.17	572.55	539.79	591.28	542.13	577.23	684.9	628.73	640.43	689.58	712.99	675.54	607.66	755.12	680.22	645.11	776.18	794.9	785.54	776.18	825.33	741.07	757.46	715.33	848.74	717.67	813.63	822.99	825.33	830.01	851.08	902.57	865.12	909.59
	48	464.89	488.29	504.68	483.61	567.87	500	523.4	537.45	525.74	572.55	453.19	649.79	474.25	537.45	595.96	523.4	560.85	614.68	633.41	617.02	628.73	593.62	666.17	624.05	614.68	635.75	727.03	731.71	741.07	677.88	645.11	738.73	705.96	773.84	764.48	846.4	811.29	787.88	769.16	783.2	745.75	780.86	822.99	869.8	902.57	820.65	851.08	921.29
	49	412.23	442.65	461.38	442.65	482.44	498.83	482.44	475.42	466.06	489.46	454.36	540.96	444.99	510.53	501.17	505.85	522.23	519.89	604.15	531.59	498.83	606.49	643.94	606.49	578.4	662.66	599.47	648.62	667.35	618.19	632.24	672.03	690.75	702.45	742.24	756.29	753.95	723.52	686.07	711.82	798.42	789.05	838.2	826.5	845.23	746.92	840.54	826.5
	50	396.87	387.5	436.66	394.53	359.42	361.76	434.32	439	427.29	492.83	431.98	457.72	471.76	436.66	382.82	511.55	464.74	478.79	474.1	546.66	532.62	474.1	495.17	467.08	584.11	527.94	570.07	560.7	614.54	595.81	570.07	595.81	602.83	520.92	616.88	595.81	644.96	633.26	621.56	649.64	705.82	673.05	647.3	708.16	694.12	701.14	771.35	787.74
Red Star (B)	1	326.896	353.889	354.669	374.33	362.004	358.102	369.491	400.701	385.097	395.549	385.564	405.069	396.8	410.685	442.519	418.8	424.886	436.745	434.56	434.247	446.573	471.384	479.497	481.057	474.661	489.015	504.152	545.344	518.507	504.931	540.35	544.409	542.848	552.99	562.354	555.489	580.14	586.383	575.304	594.497	611.815	628.356	634.752	629.137	653.166	632.569	648.797	684.996
	2	345.153	348.741	347.025	371.522	398.204	379.791	396.174	408.5	397.268	417.864	431.439	443.765	419.423	435.496	466.703	471.851	465.766	484.646	491.981	486.675	500.874	517.727	526.62	538.637	556.581	527.089	553.459	581.703	587.319	569.217	590.127	591.531	615.874	630.228	645.987	637.562	632.101	651.605	654.101	647.082	673.606	705.281	710.119	726.97	730.871	709.027	723.538	769.569
	3	267.445	294.595	297.717	300.993	329.548	326.896	327.207	353.889	343.435	379.323	360.443	398.671	380.102	375.422	406.784	390.402	404.444	413.495	439.241	452.659	438.929	443.923	462.489	479.029	449.227	470.915	482.62	548.153	511.328	518.351	526.153	524.592	540.196	557.671	583.886	586.227	582.327	600.893	595.589	631.165	630.227	633.817	674.231	656.445	669.237	674.855	678.755	710.119
	4	196.606	221.727	236.861	228.28	244.82	249.657	260.736	279.304	267.913	285.39	293.659	300.681	304.114	298.965	324.866	316.285	325.647	343.279	360.755	340.47	354.357	374.485	388.685	400.543	400.231	407.722	411.934	426.133	428.319	429.879	464.83	448.291	465.456	489.173	498.378	499.47	498.69	505.244	527.869	506.492	536.141	559.543	564.225	575.147	570.466	596.835	587.007	606.043
	5	256.789	261.972	272.505	280.53	288.721	287.551	292.064	312.461	304.269	323.162	332.691	336.202	341.551	342.386	360.276	355.762	384.516	386.189	416.114	402.069	390.868	413.439	431.997	454.399	435.005	435.507	449.216	484.826	470.448	478.138	506.391	495.86	514.081	510.069	528.125	536.15	546.349	559.051	560.894	554.372	588.31	607.37	632.614	625.591	644.817	640.136	634.619	674.241
	6	204.875	236.863	231.089	199.414	254.494	237.799	246.693	260.111	252.623	260.735	262.453	261.984	285.545	286.949	300.837	295.219	297.403	311.29	332.669	336.724	317.845	344.059	350.613	336.257	358.725	364.812	371.833	379.79	387.125	368.089	406.785	390.558	411.935	423.793	415.835	434.092	435.495	447.199	426.601	454.843	446.418	475.128	479.028	459.369	481.683	463.583	505.868	527.713
	7	335.048	342.771	349.909	362.081	385.019	371.092	369.688	414.86	387.242	402.572	388.061	419.659	398.826	418.37	448.329	438.851	417.2	467.755	450.553	473.959	454.064	478.055	476.066	496.077	519.95	486.715	504.269	545.812	523.226	518.429	533.174	552.367	542.186	572.027	568.985	557.866	591.219	582.676	579.986	592.273	611.933	633.936	639.784	631.828	653.946	637.093	649.849	679.808
	8	257.167	265.796	297.103	270.479	295.933	281.158	291.981	307.196	304.856	315.096	328.846	316.85	337.916	335.283	358.396	344.937	342.595	342.89	355.469	338.647	381.069	370.39	387.067	413.543	386.188	370.243	393.795	416.177	424.222	433.147	442.067	438.558	446.896	457.428	473.374	454.65	470.739	477.03	464.449	482.296	481.858	509.359	533.203	524.281	540.956	552.221	527.499	551.781
	9	335.009	321.902	339.377	364.499	359.351	346.869	347.022	352.953	363.876	407.721	365.279	411.935	383.536	402.105	428.319	402.729	422.233	416.927	440.801	431.128	424.105	461.397	468.419	478.404	465.455	455.625	464.986	520.223	511.641	495.726	519.6	515.543	527.555	536.763	544.253	546.437	547.063	554.551	550.027	558.921	585.915	587.007	611.035	614.469	605.263	593.873	637.717	635.845
	10	244.975	270.721	253.557	272.594	298.029	264.325	285.235	293.815	282.892	322.525	326.115	340.625	319.093	331.42	351.704	353.421	330.641	343.278	373.705	391.494	369.338	382.287	396.175	425.819	410.843	421.763	411.623	445.327	430.659	447.355	464.205	466.079	486.364	478.092	518.663	510.235	522.251	524.435	504.307	524.749	557.36	566.721	591.064	587.162	580.297	592.937	592.625	598.553
	11	252.779	251.218	262.763	261.672	273.999	265.416	278.993	301.461	264.95	314.725	275.871	301.618	305.049	313.164	338.754	318.467	348.116	328.455	361.846	359.819	348.115	367.463	379.323	395.084	383.068	381.195	408.813	435.34	402.573	408.033	424.417	462.177	453.44	440.334	454.687	445.327	456.559	475.441	475.595	491.043	490.421	533.019	515.229	533.485	533.641	529.585	565.317	559.543
	12	231.869	257.301	251.997	260.736	283.519	277.743	258.395	285.233	276.807	304.114	299.588	312.539	301.304	312.383	343.436	315.971	326.425	333.293	355.763	378.073	369.803	376.515	390.402	403.509	378.697	398.672	425.665	433.467	426.135	433.312	451.099	450.007	467.171	476.533	472.477	484.647	501.187	506.493	504.151	510.393	540.821	573.275	581.546	555.955	560.167	567.971	570.31	613.377
	13	313.319	310.51	329.549	327.363	340.159	334.228	357.945	370.429	368.399	394.614	388.373	402.105	384.628	393.99	425.043	405.069	421.296	428.163	446.886	466.547	459.057	467.327	485.74	512.265	472.163	472.321	508.521	527.714	548.621	535.827	552.522	543.16	572.184	571.091	596.837	579.205	584.977	589.035	596.525	614.312	621.178	654.256	676.259	670.641	670.173	660.031	682.813	734.149
	14	202.689	229.216	238.111	258.863	271.033	238.735	256.055	282.269	255.899	283.049	285.857	303.491	301.149	300.369	320.185	320.808	318.781	313.944	349.676	354.981	344.683	385.565	387.28	403.821	408.346	385.097	418.956	452.191	428.319	445.793	451.411	459.369	479.03	461.085	490.887	468.263	497.132	510.236	501.343	518.35	544.567	542.225	553.146	567.658	590.907	566.099	589.972	605.107
	15	206.902	244.508	237.174	243.417	256.521	236.549	256.835	298.966	294.441	300.681	283.828	313.163	303.176	309.262	319.249	325.802	334.541	334.074	362.783	358.103	369.338	374.175	389.933	385.097	386.969	385.253	413.494	433.155	433.155	426.289	453.283	436.433	471.071	489.173	492.448	476.689	486.832	492.136	501.967	521.783	525.373	562.353	557.205	544.719	549.558	536.295	549.87	610.881
	16	184.903	206.903	213.301	233.117	243.261	233.743	220.947	254.182	247.473	265.573	260.425	293.504	264.479	280.239	303.334	295.844	283.517	307.702	329.391	333.448	347.335	363.719	342.029	370.741	355.137	366.372	408.813	418.488	417.865	424.573	423.169	425.51	439.241	469.824	466.39	473.257	490.733	479.498	469.824	491.045	499.471	536.138	538.011	543.941	569.532	558.608	595.745	605.575
	17	348.74	332.36	402.57	435.34	470.45	461.09	402.57	414.27	477.47	465.77	479.81	433	479.81	395.55	503.22	514.92	477.47	531.3	465.77	568.75	505.56	486.83	500.87	587.47	519.6	580.45	535.98	634.29	688.12	622.58	662.37	620.24	603.86	627.26	690.46	671.73	664.71	706.84	695.14	648.33	711.52	741.95	746.63	758.33	774.72	823.87	781.74	753.65
	18	330.02	379.17	435.34	372.15	404.91	367.46	351.08	400.23	353.42	383.85	454.06	440.02	362.78	472.79	418.96	463.43	456.4	442.36	428.32	454.06	428.32	550.03	547.69	552.37	500.87	484.49	620.24	634.29	557.05	528.96	582.79	641.31	592.16	627.26	662.37	641.31	629.6	660.03	629.6	594.5	688.12	695.14	709.18	716.2	685.78	704.5	739.61	793.44
	19	332.36	322.99	252.78	299.59	325.33	353.42	367.46	365.12	440.02	388.53	416.62	409.59	369.8	418.96	451.72	425.98	449.38	526.62	512.58	507.9	517.26	533.64	496.19	510.24	561.73	482.15	564.07	510.24	575.77	538.32	608.54	503.22	554.71	596.84	559.39	580.45	554.71	592.16	613.22	592.16	664.71	653.01	713.86	772.38	617.9	676.41	713.86	683.44
	20	346.4	402.57	362.78	311.29	383.85	430.66	355.76	463.43	388.53	461.09	491.51	404.91	418.96	470.45	470.45	470.45	505.56	521.94	475.13	444.7	528.96	484.49	498.53	505.56	636.63	514.92	540.66	594.5	622.58	589.82	617.9	601.52	653.01	645.99	713.86	681.1	613.22	695.14	674.07	734.93	704.5	631.94	732.59	809.83	763.01	725.57	704.5	809.83
	21	358.1	348.74	386.19	442.36	449.38	449.38	365.12	447.04	423.64	456.4	423.64	411.93	458.75	472.79	496.19	472.79	519.6	521.94	559.39	524.28	521.94	594.5	601.52	566.41	571.09	500.87	566.41	650.67	617.9	601.52	573.43	660.03	683.44	734.93	688.12	631.94	631.94	641.31	643.65	695.14	746.63	739.61	711.52	753.65	784.08	765.36	734.93	793.44
	22	381.51	348.74	372.15	418.96	463.43	381.51	477.47	449.38	376.83	423.64	421.3	428.32	477.47	428.32	437.68	454.06	491.51	498.53	524.28	510.24	498.53	540.66	559.39	589.82	578.11	547.69	554.71	585.13	617.9	620.24	573.43	690.46	594.5	671.73	692.8	697.48	634.29	627.26	692.8	636.63	711.52	653.01	702.16	697.48	770.04	648.33	683.44	826.21
	23	245.76	327.68	351.08	308.95	376.83	318.31	428.32	409.59	402.57	376.83	435.34	475.13	397.89	437.68	475.13	482.15	433	500.87	451.72	491.51	500.87	528.96	498.53	589.82	568.75	510.24	554.71	582.79	514.92	535.98	550.03	545.34	613.22	575.77	585.13	592.16	582.79	690.46	624.92	617.9	594.5	699.82	695.14	669.39	704.5	765.36	772.38	753.65
	24	351.08	308.95	337.04	308.95	351.08	362.78	418.96	411.93	332.36	355.76	465.77	440.02	456.4	454.06	458.75	454.06	468.11	479.81	512.58	404.91	543	573.43	545.34	528.96	505.56	519.6	521.94	545.34	613.22	617.9	587.47	648.33	706.84	613.22	575.77	613.22	650.67	603.86	664.71	636.63	627.26	732.59	685.78	753.65	755.99	737.27	709.18	737.27
	25	341.72	433	318.31	418.96	400.23	402.57	465.77	414.27	458.75	449.38	437.68	449.38	440.02	491.51	512.58	528.96	456.4	500.87	512.58	498.53	491.51	510.24	622.58	589.82	641.31	512.58	575.77	594.5	622.58	587.47	606.2	624.92	753.65	709.18	664.71	641.31	681.1	676.41	671.73	730.25	772.38	788.76	812.17	770.04	753.65	744.29	699.82	823.87
	26	318.31	388.53	337.04	379.17	400.23	374.49	374.49	440.02	433	475.13	360.44	365.12	365.12	425.98	395.55	416.62	447.04	519.6	442.36	489.17	531.3	519.6	568.75	554.71	566.41	442.36	517.26	566.41	547.69	603.86	557.05	564.07	575.77	554.71	685.78	667.05	613.22	709.18	606.2	718.54	664.71	629.6	727.91	732.59	732.59	678.76	725.57	725.57
	27	264.48	372.15	290.23	320.65	393.21	386.19	379.17	372.15	395.55	428.32	435.34	472.79	491.51	411.93	395.55	407.25	449.38	465.77	463.43	444.7	533.64	557.05	521.94	489.17	592.16	603.86	514.92	568.75	589.82	571.09	575.77	596.84	599.18	571.09	545.34	601.52	617.9	571.09	550.03	737.27	674.07	695.14	695.14	678.76	718.54	688.12	786.42	802.8
	28	269.16	220.01	255.12	304.27	306.61	248.1	273.84	273.84	360.44	365.12	271.5	411.93	381.51	348.74	402.57	376.83	440.02	449.38	409.59	414.27	346.4	374.49	456.4	437.68	444.7	386.19	435.34	568.75	496.19	557.05	557.05	531.3	533.64	514.92	566.41	573.43	592.16	535.98	645.99	521.94	653.01	561.73	643.65	543	655.35	660.03	559.39	636.63
	29	278.52	334.7	313.63	334.7	290.23	386.19	294.91	339.38	367.46	381.51	421.3	381.51	397.89	428.32	454.06	409.59	416.62	376.83	404.91	547.69	463.43	512.58	451.72	631.94	463.43	517.26	554.71	582.79	526.62	524.28	561.73	493.85	575.77	545.34	627.26	610.88	613.22	657.69	610.88	655.35	580.45	683.44	695.14	772.38	732.59	744.29	739.61	779.4
	30	285.55	351.08	318.31	245.76	344.06	390.87	355.76	372.15	383.85	407.25	418.96	388.53	369.8	327.68	414.27	400.23	379.17	470.45	407.25	414.27	468.11	414.27	458.75	510.24	435.34	512.58	510.24	587.47	454.06	500.87	442.36	486.83	575.77	486.83	545.34	648.33	550.03	601.52	634.29	589.82	568.75	606.2	669.39	723.23	676.41	678.76	629.6	608.54
	31	330.02	358.1	355.76	365.12	362.78	318.31	362.78	414.27	395.55	461.09	449.38	514.92	440.02	402.57	496.19	463.43	479.81	528.96	582.79	496.19	507.9	477.47	585.13	540.66	545.34	477.47	557.05	622.58	629.6	566.41	524.28	664.71	552.37	648.33	657.69	725.57	706.84	695.14	741.95	688.12	755.99	744.29	816.85	772.38	704.5	746.63	758.33	748.97
	32	187.24	290.23	278.52	327.68	376.83	308.95	341.72	353.42	297.25	325.33	334.7	428.32	369.8	454.06	393.21	400.23	395.55	376.83	442.36	475.13	475.13	421.3	428.32	498.53	435.34	437.68	538.32	571.09	519.6	472.79	512.58	472.79	535.98	540.66	512.58	514.92	507.9	587.47	610.88	552.37	617.9	669.39	589.82	643.65	667.05	634.29	648.33	676.41
	33	271.5	311.29	386.19	313.63	358.1	379.17	386.19	365.12	362.78	437.68	369.8	482.15	447.04	472.79	479.81	437.68	484.49	458.75	524.28	498.53	470.45	475.13	540.66	468.11	472.79	493.85	510.24	564.07	573.43	592.16	617.9	566.41	674.07	688.12	641.31	653.01	695.14	643.65	617.9	620.24	699.82	648.33	678.76	737.27	781.74	741.95	795.78	786.42
	34	294.91	187.24	266.82	238.73	290.23	194.26	344.06	330.02	311.29	381.51	313.63	327.68	367.46	313.63	344.06	358.1	372.15	388.53	402.57	381.51	407.25	388.53	379.17	433	353.42	493.85	437.68	561.73	491.51	430.66	540.66	510.24	519.6	489.17	507.9	531.3	552.37	587.47	566.41	730.25	606.2	650.67	695.14	582.79	688.12	681.1	699.82	720.88
	35	238.73	222.35	227.03	255.12	229.37	269.16	243.42	236.39	252.78	280.86	259.8	372.15	257.46	327.68	341.72	379.17	414.27	353.42	465.77	421.3	360.44	337.04	416.62	489.17	468.11	374.49	447.04	472.79	416.62	433	528.96	505.56	447.04	528.96	528.96	566.41	540.66	451.72	416.62	496.19	479.81	627.26	608.54	629.6	706.84	669.39	645.99	650.67
	36	327.68	287.89	280.86	285.55	264.48	283.2	318.31	351.08	351.08	374.49	341.72	257.46	365.12	334.7	341.72	383.85	400.23	404.91	440.02	402.57	454.06	440.02	475.13	503.22	500.87	416.62	470.45	496.19	571.09	528.96	594.5	510.24	599.18	505.56	578.11	580.45	610.88	575.77	620.24	620.24	540.66	622.58	622.58	580.45	690.46	601.52	582.79	662.37
	37	271.5	278.52	231.71	245.76	292.57	203.63	283.2	320.65	276.18	334.7	294.91	332.36	381.51	411.93	341.72	327.68	397.89	425.98	367.46	360.44	402.57	353.42	404.91	383.85	393.21	449.38	402.57	468.11	404.91	484.49	493.85	484.49	414.27	479.81	559.39	435.34	514.92	540.66	543	505.56	526.62	599.18	599.18	676.41	674.07	631.94	610.88	725.57
	38	189.58	245.76	212.99	184.9	236.39	184.9	255.12	322.99	205.97	278.52	252.78	243.42	299.59	322.99	311.29	278.52	250.44	337.04	306.61	301.93	325.33	381.51	339.38	379.17	334.7	428.32	353.42	433	430.66	341.72	390.87	437.68	433	414.27	491.51	395.55	475.13	500.87	489.17	477.47	456.4	449.38	528.96	526.62	489.17	519.6	514.92	519.6
	39	231.71	269.16	208.31	234.05	210.65	280.86	301.93	271.5	276.18	264.48	245.76	311.29	341.72	353.42	355.76	294.91	301.93	353.42	379.17	355.76	318.31	379.17	402.57	346.4	381.51	351.08	402.57	376.83	425.98	423.64	493.85	411.93	456.4	418.96	400.23	461.09	538.32	454.06	447.04	407.25	451.72	571.09	571.09	482.15	566.41	514.92	585.13	564.07
	40	126.39	121.71	95.96	114.69	117.03	140.43	84.26	159.16	173.2	93.62	154.48	77.24	133.41	105.32	147.45	131.07	138.09	128.73	201.29	145.11	128.73	140.43	161.5	121.71	196.6	163.84	170.86	138.09	215.33	177.88	163.84	241.08	170.86	210.65	271.5	257.46	250.44	198.95	292.57	245.76	290.23	152.13	266.82	217.67	245.76	234.05	325.33	278.52
	41	220.01	205.97	227.03	156.82	220.01	257.46	308.95	255.12	217.67	278.52	259.8	210.65	276.18	269.16	276.18	322.99	273.84	248.1	308.95	308.95	341.72	355.76	414.27	315.97	299.59	355.76	421.3	318.31	372.15	423.64	428.32	430.66	297.25	425.98	423.64	425.98	369.8	395.55	388.53	395.55	388.53	470.45	440.02	442.36	472.79	423.64	559.39	493.85
	42	257.46	276.18	278.52	215.33	301.93	271.5	262.14	278.52	276.18	341.72	292.57	290.23	318.31	266.82	304.27	245.76	320.65	351.08	299.59	388.53	353.42	372.15	440.02	411.93	486.83	407.25	400.23	465.77	454.06	463.43	444.7	454.06	428.32	512.58	437.68	524.28	468.11	468.11	440.02	587.47	475.13	486.83	573.43	568.75	493.85	475.13	524.28	580.45
	43	168.52	220.01	245.76	191.92	297.25	231.71	308.95	252.78	290.23	304.27	325.33	341.72	297.25	297.25	395.55	402.57	395.55	367.46	381.51	355.76	400.23	386.19	388.53	379.17	421.3	444.7	409.59	414.27	367.46	369.8	374.49	360.44	447.04	444.7	444.7	440.02	449.38	550.03	493.85	524.28	510.24	505.56	545.34	540.66	526.62	461.09	622.58	599.18
	44	327.68	325.33	285.55	276.18	318.31	330.02	290.23	301.93	337.04	306.61	257.46	320.65	358.1	414.27	388.53	421.3	367.46	390.87	468.11	409.59	397.89	425.98	463.43	414.27	383.85	372.15	500.87	500.87	423.64	416.62	521.94	463.43	500.87	491.51	477.47	524.28	517.26	538.32	435.34	617.9	592.16	634.29	571.09	512.58	608.54	608.54	599.18	613.22
	45	198.95	243.42	276.18	243.42	269.16	294.91	262.14	332.36	250.44	252.78	266.82	278.52	294.91	386.19	271.5	301.93	362.78	365.12	351.08	381.51	245.76	330.02	348.74	369.8	393.21	444.7	404.91	411.93	414.27	367.46	519.6	397.89	468.11	521.94	407.25	470.45	477.47	435.34	493.85	528.96	449.38	482.15	498.53	456.4	526.62	514.92	482.15	608.54
	46	280.86	320.65	339.38	264.48	425.98	287.89	257.46	313.63	332.36	353.42	409.59	339.38	280.86	421.3	386.19	365.12	341.72	500.87	475.13	397.89	472.79	484.49	400.23	472.79	498.53	470.45	475.13	519.6	461.09	442.36	528.96	550.03	571.09	498.53	533.64	596.84	575.77	606.2	547.69	521.94	550.03	664.71	613.22	575.77	627.26	575.77	615.56	669.39
	47	234.05	205.97	301.93	290.23	280.86	301.93	257.46	311.29	348.74	287.89	304.27	344.06	395.55	294.91	358.1	306.61	395.55	369.8	411.93	449.38	374.49	360.44	353.42	390.87	442.36	440.02	425.98	461.09	447.04	400.23	447.04	416.62	543	477.47	428.32	479.81	444.7	554.71	500.87	479.81	451.72	498.53	545.34	545.34	550.03	521.94	573.43	575.77
	48	287.89	297.25	208.31	250.44	264.48	332.36	292.57	304.27	358.1	341.72	337.04	346.4	360.44	332.36	365.12	400.23	346.4	395.55	386.19	411.93	341.72	447.04	451.72	411.93	451.72	418.96	435.34	440.02	479.81	468.11	475.13	416.62	463.43	486.83	535.98	519.6	531.3	564.07	552.37	538.32	524.28	578.11	564.07	624.92	505.56	493.85	568.75	603.86
	49	278.52	308.95	318.31	339.38	353.42	346.4	358.1	355.76	332.36	447.04	411.93	430.66	362.78	423.64	421.3	400.23	407.25	524.28	411.93	465.77	479.81	360.44	482.15	491.51	543	411.93	472.79	505.56	475.13	521.94	512.58	465.77	578.11	540.66	517.26	470.45	601.52	521.94	533.64	573.43	585.13	594.5	524.28	596.84	535.98	573.43	566.41	592.16
	50	264.48	234.05	243.42	330.02	381.51	332.36	262.14	376.83	325.33	348.74	327.68	313.63	367.46	320.65	311.29	374.49	383.85	393.21	425.98	390.87	374.49	463.43	381.51	346.4	470.45	411.93	358.1	397.89	430.66	470.45	456.4	468.11	430.66	479.81	440.02	388.53	507.9	559.39	475.13	484.49	505.56	571.09	535.98	524.28	561.73	596.84	543	578.11
Gala Apple (A)	1	430.325	441.25	413.163	443.591	471.365	448.74	450.611	465.903	469.336	483.223	485.252	490.713	481.039	484.473	490.401	509.749	511.621	488.217	526.758	518.487	521.139	527.849	542.205	544.387	532.842	540.489	560.773	553.753	548.601	557.653	591.669	595.881	584.18	603.527	608.364	590.576	606.648	615.853	609.611	641.754	643.783	671.402	673.119	668.749	670.779	677.019	674.836	688.409
	2	360.726	383.662	398.017	394.429	391.463	394.273	401.919	423.139	431.097	420.019	419.238	422.515	409.72	420.019	437.027	435.309	433.907	441.083	446.545	450.289	447.481	450.757	479.625	488.05	474.474	454.191	490.547	484.93	486.49	485.866	482.745	494.446	507.711	527.682	520.819	519.57	530.649	512.081	519.725	530.335	538.605	550.933	564.664	566.225	580.268	552.494	572.933	599.303
	3	453.506	478.373	471.5	484.373	484.078	480.861	478.666	500.317	492.856	511.289	496.953	506.752	505.29	515.091	523.723	534.692	516.848	523.137	555.906	543.324	551.955	577.847	545.958	582.675	585.601	584.869	598.766	618.221	609.446	609.006	621.586	621.147	633.434	644.551	665.034	642.943	652.306	660.936	661.666	660.205	686.974	701.311	715.499	718.865	713.599	739.344	731.445	751.924
	4	409.507	411.378	417.932	426.045	421.054	422.926	411.847	452.573	460.374	440.557	462.402	459.593	468.955	479.565	483.934	468.175	478.941	500.631	508.589	502.815	515.923	510.929	524.349	525.597	537.143	544.477	567.257	548.533	551.031	543.851	567.882	588.011	576.307	613.601	620.466	595.501	603.459	612.506	592.067	622.963	633.417	664.001	670.554	659.007	662.751	664.781	667.435	706.443
	5	415.503	433.448	445.151	463.874	471.052	456.074	459.194	480.726	472.612	507.253	497.735	502.416	492.897	512.557	525.977	505.068	531.439	534.403	554.531	553.128	533.621	549.071	569.666	569.511	548.602	571.85	573.722	608.208	615.698	620.533	623.342	618.038	632.393	669.374	672.339	644.095	660.167	672.183	652.833	695.431	700.583	734.441	744.115	723.206	735.689	718.526	755.193	779.067
	6	383.189	409.814	416.104	415.371	417.274	413.47	410.252	428.83	428.684	453.699	441.264	448.871	453.844	452.675	484.563	458.381	458.233	481.784	504.458	487.197	493.926	500.654	535.324	530.934	508.554	495.828	528.447	567.653	536.493	562.678	564.581	585.353	576.724	595.446	594.57	581.843	602.908	617.244	599.249	620.023	609.782	656.886	654.545	650.451	661.859	663.908	678.683	675.758
	7	307.44	311.185	325.696	318.987	326.163	326.163	338.958	342.235	334.901	364.237	333.027	368.137	339.739	353.625	375.627	372.194	358.776	367.199	393.103	392.791	385.925	408.396	380.932	428.367	395.755	412.608	414.636	440.849	424.778	433.984	431.801	443.971	452.239	470.809	457.235	445.687	478.767	455.829	479.548	481.42	493.278	509.037	516.839	526.201	532.287	524.174	526.981	561.933
	8	380.765	393.093	423.677	413.689	410.723	438.187	421.179	434.13	431.011	455.663	440.527	460.187	448.954	455.351	475.481	479.223	477.04	495.295	516.205	509.651	507.467	513.397	524.943	549.442	552.249	531.809	540.077	559.115	563.952	575.031	580.025	565.513	593.131	619.501	619.657	613.572	639.629	623.871	634.794	631.359	653.983	674.27	696.739	689.717	687.688	692.525	705.477	745.109
	9	386.481	398.963	390.694	410.667	416.44	411.291	411.603	432.824	425.333	435.943	420.497	464.968	434.539	436.881	466.526	466.059	461.066	470.117	504.443	495.081	492.897	514.587	501.791	528.631	521.92	513.65	537.523	558.276	541.581	568.419	564.519	576.533	576.222	606.024	614.761	600.25	610.549	607.583	606.022	625.059	646.904	672.028	672.806	667.813	679.048	669.685	701.517	730.852
	10	364.1	392.19	401.55	328.99	378.14	380.48	401.55	406.23	366.44	431.98	385.16	434.32	427.29	354.74	448.36	455.38	436.66	399.21	469.42	506.87	469.42	490.49	441.34	565.39	556.02	457.72	530.28	506.87	506.87	504.53	532.62	532.62	598.15	492.83	541.98	518.57	616.88	584.11	530.28	598.15	619.22	598.15	602.83	647.3	530.28	572.41	607.52	623.9
	11	386.19	411.93	435.34	437.68	407.25	400.23	437.68	374.49	496.19	470.45	451.72	393.21	440.02	463.43	472.79	538.32	484.49	430.66	477.47	456.4	489.17	491.51	503.22	545.34	568.75	493.85	613.22	636.63	486.83	573.43	638.97	601.52	599.18	624.92	594.5	617.9	622.58	653.01	603.86	695.14	645.99	730.25	744.29	660.03	713.86	713.86	730.25	732.59
	12	368.34	351.96	459.62	384.73	445.58	424.51	445.58	403.45	384.73	468.98	394.09	429.2	445.58	501.75	513.46	499.41	433.88	525.16	499.41	447.92	520.48	440.9	550.9	571.97	527.5	583.67	562.61	546.22	553.24	590.69	532.18	567.29	578.99	621.12	642.18	625.8	553.24	674.95	663.25	670.27	630.48	691.34	691.34	681.97	670.27	609.42	665.59	700.7
	13	444.85	519.75	386.33	374.63	449.53	454.21	407.4	489.32	475.28	428.46	454.21	519.75	512.72	496.34	508.04	533.79	550.17	573.58	561.87	561.87	552.51	543.15	559.53	550.17	566.56	582.94	545.49	615.71	578.26	643.79	618.05	620.39	674.22	653.16	657.84	611.03	648.47	667.2	674.22	711.67	636.77	732.73	721.03	749.12	732.73	660.18	760.82	704.65
	14	345.23	373.32	340.55	363.95	410.76	363.95	366.29	406.08	436.51	406.08	459.92	469.28	389.7	436.51	452.89	340.55	380.34	410.76	443.53	480.98	480.98	488	476.3	506.73	513.75	448.21	530.13	464.6	537.15	518.43	546.52	586.3	590.99	509.07	544.17	590.99	527.79	539.49	572.26	539.49	616.73	628.43	616.73	663.54	588.64	633.11	581.62	614.39
	15	265.36	438.56	291.1	375.36	314.51	354.3	356.64	422.17	368.34	459.62	349.62	410.47	380.04	358.98	436.22	335.57	366	436.22	447.92	419.83	424.51	454.94	417.49	384.73	443.24	408.13	445.58	403.45	429.2	356.64	513.46	478.35	459.62	443.24	487.71	536.86	440.9	461.96	459.62	464.3	473.67	485.37	548.56	529.84	480.69	518.14	515.8	452.6
	16	435.63	428.61	512.87	503.51	522.23	512.87	529.25	578.4	555	555	512.87	587.77	538.62	482.44	547.98	510.53	585.43	632.24	576.06	634.58	629.9	601.81	576.06	599.47	566.7	711.82	695.43	622.88	655.64	594.79	760.97	681.39	758.63	760.97	739.9	679.05	746.92	681.39	653.3	718.84	775.01	786.71	847.57	782.03	861.61	877.99	877.99	847.57
	17	383.85	383.85	383.85	372.15	395.55	393.21	374.49	416.62	344.06	386.19	425.98	418.96	416.62	393.21	433	395.55	402.57	376.83	528.96	447.04	475.13	449.38	503.22	489.17	465.77	477.47	547.69	533.64	550.03	479.81	505.56	510.24	554.71	535.98	540.66	491.51	601.52	566.41	543	594.5	601.52	620.24	613.22	617.9	620.24	645.99	653.01	629.6
	18	380.63	411.06	389.99	422.76	464.89	427.44	446.16	476.59	481.27	485.95	464.89	478.93	394.67	439.14	507.02	455.53	478.93	563.19	495.32	469.57	542.13	600.64	542.13	497.66	483.61	514.04	523.4	535.1	495.32	553.83	518.72	530.42	556.17	549.15	628.73	570.21	595.96	558.51	628.73	600.64	624.05	605.32	621.7	647.45	631.07	677.88	715.33	638.09
	19	459.92	431.83	502.04	427.15	448.21	438.85	495.02	417.79	502.04	495.02	476.3	495.02	548.86	473.96	516.09	576.94	492.68	485.66	506.73	544.17	640.14	520.77	569.92	574.6	616.73	637.8	553.54	614.39	488	579.28	598.01	640.14	682.27	698.65	619.07	595.67	586.3	605.03	586.3	626.09	647.16	658.86	607.37	712.69	626.09	689.29	759.5	761.84
	20	342.01	320.95	285.84	318.61	377.12	377.12	360.74	290.52	323.29	304.56	360.74	365.42	419.25	367.76	379.46	400.52	302.22	346.69	388.82	407.55	405.21	430.95	412.23	421.59	437.97	384.14	440.31	468.4	421.59	459.04	444.99	430.95	477.76	498.83	512.87	522.23	494.15	510.53	503.51	487.12	522.23	524.57	583.09	494.15	501.17	545.64	571.38	597.13
	21	341.13	359.86	313.05	418.37	380.92	378.58	378.58	327.09	399.65	369.22	406.67	418.37	320.07	390.28	376.24	423.05	387.94	390.28	446.46	418.37	481.57	387.94	369.22	399.65	371.56	458.16	441.78	474.54	420.71	444.12	500.29	533.06	479.22	551.78	441.78	486.25	493.27	519.01	462.84	476.88	432.41	528.38	540.08	568.17	521.35	565.82	572.85	556.46
	22	407.69	531.74	456.84	449.82	480.25	475.57	435.78	468.55	482.59	538.76	459.18	496.63	541.1	503.65	573.87	545.78	538.76	580.89	508.34	543.44	573.87	534.08	648.77	590.25	562.17	550.46	590.25	625.36	571.53	613.66	637.06	662.81	608.98	630.04	644.09	625.36	637.06	630.04	686.22	676.85	683.88	660.47	676.85	775.16	693.24	674.51	700.26	707.28
	23	310.85	299.15	334.26	324.9	273.4	296.81	350.64	324.9	397.45	352.98	317.87	327.24	341.28	350.64	413.84	343.62	378.73	385.75	411.5	390.43	376.39	406.81	420.86	418.52	406.81	395.11	441.92	418.52	470.01	448.94	374.05	418.52	378.73	404.47	512.14	462.99	420.86	423.2	392.77	437.24	458.31	507.46	488.73	474.69	493.41	500.44	537.88	516.82
	24	426.56	527.21	487.42	513.16	494.44	552.95	538.91	513.16	559.97	503.8	513.16	541.25	585.72	637.21	531.89	571.68	538.91	529.55	691.04	555.29	543.59	616.15	637.21	618.49	679.34	623.17	679.34	653.59	691.04	719.13	688.7	672.32	686.36	684.02	700.41	693.38	730.83	669.98	691.04	674.66	770.62	758.92	740.19	772.96	889.99	822.11	761.26	775.3
	25	399.79	409.15	413.84	441.92	451.28	455.97	453.63	519.16	495.75	523.84	493.41	488.73	575.33	505.12	598.74	572.99	530.86	584.7	568.31	603.42	526.18	572.99	615.12	619.8	629.17	619.8	594.06	629.17	580.01	572.99	629.17	645.55	619.8	701.72	678.32	631.51	732.15	619.8	661.93	720.45	706.4	764.92	739.17	753.21	657.25	697.04	757.89	729.81
	26	447.63	442.95	524.87	485.08	473.37	445.29	456.99	536.57	478.05	426.56	510.82	555.29	522.52	571.68	595.08	538.91	520.18	590.4	604.44	564.65	611.46	597.42	613.81	634.87	578.7	627.85	672.32	679.34	634.87	684.02	646.57	686.36	613.81	688.7	609.12	597.42	712.11	669.98	712.11	761.26	693.38	812.75	801.05	756.58	723.81	751.9	770.62	761.26
	27	454.94	513.46	494.73	497.07	576.65	497.07	564.95	546.22	543.88	543.88	564.95	534.52	499.41	604.74	623.46	616.44	543.88	600.05	597.71	635.16	639.84	597.71	672.61	632.82	649.21	635.16	649.21	663.25	733.47	672.61	672.61	700.7	710.06	714.74	689	735.81	691.34	731.12	740.49	745.17	763.89	815.38	763.89	841.13	796.66	782.62	841.13	700.7
	28	346.55	367.61	344.21	295.05	313.78	327.82	292.71	374.63	311.44	302.08	269.31	318.46	330.16	346.55	391.02	355.91	334.84	412.08	355.91	360.59	391.02	426.12	454.21	367.61	379.31	388.68	360.59	398.04	376.97	383.99	430.8	428.46	386.33	393.36	409.74	407.4	393.36	465.91	475.28	426.12	416.76	522.09	484.64	486.98	449.53	444.85	376.97	501.02
	29	287.3	247.51	242.83	254.53	310.71	294.32	324.75	324.75	359.86	334.11	380.92	343.47	329.43	383.26	308.37	350.5	327.09	324.75	327.09	287.3	362.2	331.77	394.97	387.94	366.88	352.84	320.07	385.6	385.6	376.24	444.12	378.58	359.86	394.97	355.18	369.22	423.05	462.84	334.11	315.39	423.05	495.61	439.44	460.5	481.57	425.39	425.39	598.59
	30	421.74	377.27	360.88	332.79	349.18	318.75	447.48	358.54	449.82	428.76	496.63	445.14	482.59	419.39	503.65	482.59	393.65	459.18	482.59	468.55	529.4	484.93	461.52	473.23	510.68	447.48	510.68	557.49	508.34	552.81	470.89	590.25	571.53	543.44	555.15	585.57	625.36	576.21	555.15	611.32	611.32	564.51	545.78	599.62	587.91	644.09	679.19	665.15
	31	364.869	366.43	379.538	402.787	396.702	360.814	414.177	409.495	399.822	406.063	414.021	423.852	404.503	414.177	431.029	429.001	432.589	435.243	481.897	449.443	473.314	462.548	452.873	498.28	473.784	503.741	502.025	512.479	513.416	499.996	536.51	517.005	551.332	560.695	547.9	544.154	559.447	557.885	578.483	559.759	589.561	610.94	623.421	620.769	625.917	616.867	636.527	643.237
	32	405.84	430.65	429.712	423.939	451.401	439.698	449.373	462.792	462.48	474.962	470.906	481.05	466.223	472.465	512.256	482.609	484.949	494.157	530.667	508.353	528.015	537.689	534.725	548.924	550.641	552.201	577.792	578.884	569.677	576.698	600.729	604.473	615.552	610.559	635.524	617.579	628.189	626.941	633.027	653.311	661.114	686.703	702.307	692.007	683.895	696.067	706.833	711.825
	33	397.597	406.025	421.161	422.097	433.173	437.077	447.063	435.984	450.182	461.104	445.188	467.346	478.425	480.141	495.278	493.872	466.409	489.816	523.52	503.234	525.861	519.15	531.946	535.69	539.903	545.987	550.982	587.805	549.421	566.429	568.301	587.651	584.842	603.877	598.729	595.609	612.772	605.905	609.183	620.885	645.228	661.611	660.831	679.555	655.838	671.753	684.547	693.598
	34	362.461	371.824	372.76	376.191	395.23	370.263	388.831	406.929	402.718	406.151	406.307	435.953	413.641	434.863	450.777	431.43	414.889	434.393	456.239	452.338	446.721	460.763	466.225	478.084	472.467	466.225	472.155	491.035	501.177	502.58	505.233	513.659	521.461	513.192	528.172	537.066	542.059	542.837	536.909	542.839	559.222	580.911	559.534	584.19	601.041	593.55	589.181	616.019
	35	381.693	407.907	397.142	399.793	406.813	390.586	380.911	419.923	411.496	412.276	420.077	436.772	435.055	432.405	457.682	434.12	434.744	471.569	465.173	453.469	470.945	491.229	485.144	508.081	491.697	498.096	499.5	518.693	523.062	512.605	545.842	514.635	532.423	551.148	555.047	541.785	577.986	576.424	558.325	592.186	602.485	614.965	623.704	617.618	607.476	616.995	618.087	647.89
	36	406.122	422.661	424.377	442.479	441.854	450.124	436.081	450.749	450.749	458.551	458.393	471.969	466.976	468.223	493.813	484.296	480.707	482.267	515.035	511.447	520.652	507.389	533.448	535.475	545.93	527.83	543.276	587.747	571.833	572.611	570.895	595.705	597.889	589.309	623.792	609.905	624.729	639.395	634.557	636.587	626.756	668.887	669.979	683.866	683.084	677.312	684.334	696.349
	37	405.772	432.141	431.516	447.277	446.807	435.731	444	466.312	455.545	478.173	483.476	491.746	488.313	509.379	511.407	502.2	503.293	514.372	544.018	541.054	532.783	561.028	570.234	550.727	564.46	574.289	582.559	607.213	591.453	611.427	607.993	600.348	634.674	620.633	642.478	624.533	640.605	643.881	646.691	669.939	682.577	689.133	689.757	707.076	713.005	696.153	717.374	746.396
	38	376.065	413.358	441.601	434.734	427.713	420.381	433.175	450.652	430.677	444.253	433.333	459.857	461.573	454.395	497.304	471.559	501.519	495.432	501.52	499.489	521.335	525.081	537.875	535.066	518.527	529.449	545.989	586.401	567.832	556.442	563.777	585.933	602.005	596.701	607.623	598.573	611.212	603.877	611.211	633.368	657.71	658.803	676.435	680.648	678.619	687.825	687.825	719.031
	39	368.917	393.727	384.208	399.657	417.132	394.351	427.431	425.559	424.778	446.779	430.551	453.021	430.084	465.973	473.773	451.615	445.063	464.879	482.667	464.411	487.193	495.774	499.831	514.343	497.647	506.54	537.28	553.507	524.953	543.989	549.139	561.465	569.581	572.231	588.773	572.544	571.139	584.87	588.772	593.609	617.483	646.035	625.441	628.871	643.853	651.967	650.563	675.995
	40	369.95	435.49	414.42	412.08	412.08	374.63	386.33	440.17	374.63	367.61	407.4	472.93	416.76	405.06	468.25	442.51	379.31	447.19	479.96	512.72	461.23	557.19	533.79	510.38	519.75	524.43	451.87	484.64	489.32	543.15	536.13	470.59	517.4	515.06	545.49	557.19	573.58	582.94	594.64	625.07	632.09	641.45	636.77	643.79	568.9	636.77	674.22	650.82
	41	335.87	359.27	289.06	385.02	321.82	314.8	310.12	378	338.21	331.19	277.35	363.95	335.87	431.83	424.81	361.61	434.17	389.7	424.81	368.63	434.17	410.76	387.36	415.45	448.21	406.08	410.76	420.13	415.45	370.97	443.53	483.32	483.32	427.15	471.62	436.51	469.28	457.57	392.04	464.6	518.43	532.47	518.43	455.23	525.45	459.92	485.66	569.92
	42	317.29	275.16	258.78	251.75	291.54	324.31	321.97	310.27	312.61	303.25	338.35	382.82	336.01	399.21	340.69	312.61	338.35	396.87	417.93	375.8	347.72	422.61	375.8	429.63	413.25	399.21	410.91	441.34	446.02	497.51	352.4	417.93	446.02	485.81	467.08	462.4	483.47	469.42	478.79	483.47	478.79	478.79	516.23	481.13	483.47	476.45	469.42	504.53
	43	363.51	415.01	431.39	347.13	337.77	300.32	340.11	368.2	412.67	447.77	445.43	344.79	407.98	422.03	433.73	368.2	379.9	386.92	393.94	480.54	422.03	436.07	501.61	454.8	471.18	426.71	459.48	466.5	536.71	443.09	487.56	447.77	464.16	464.16	480.54	611.61	536.71	541.4	560.12	562.46	515.65	567.14	646.72	510.97	560.12	539.05	595.23	597.57
	44	414.13	460.94	444.56	407.11	393.06	425.83	449.24	411.79	465.62	474.98	477.32	451.58	463.28	498.39	507.75	421.15	423.49	556.9	533.5	533.5	474.98	540.52	517.11	582.65	512.43	613.07	638.82	613.07	496.05	610.73	622.44	575.63	589.67	610.73	624.78	627.12	622.44	683.29	641.16	692.65	716.06	643.5	683.29	730.1	657.54	713.72	730.1	711.38
	45	357.08	434.32	441.34	476.45	455.38	467.08	422.61	499.85	420.27	485.81	441.34	448.36	443.68	483.47	492.83	532.62	469.42	436.66	525.6	476.45	457.72	549	511.55	551.34	481.13	588.79	530.28	553.68	541.98	558.36	647.3	523.26	565.39	621.56	595.81	626.24	651.99	717.52	626.24	680.07	654.33	680.07	717.52	668.37	724.54	747.95	705.82	757.31
	46	419.39	419.39	475.57	410.03	410.03	417.05	501.31	470.89	421.74	428.76	433.44	484.93	484.93	468.55	513.02	505.99	555.15	548.12	515.36	475.57	491.95	522.38	592.59	630.04	550.46	515.36	557.49	611.32	569.19	613.66	662.81	608.98	627.7	672.17	611.32	527.06	681.53	672.17	697.92	665.15	662.81	751.75	655.79	791.54	716.64	796.22	796.22	793.88
	47	448.07	396.57	356.79	438.7	438.7	445.73	384.87	466.79	438.7	422.32	457.43	434.02	483.17	452.75	459.77	478.49	480.83	553.39	511.26	436.36	555.73	497.22	544.03	579.14	546.37	492.54	534.67	555.73	618.93	553.39	576.8	590.84	560.41	684.46	611.9	668.08	665.74	644.67	661.06	621.27	670.42	658.71	644.67	698.5	635.31	670.42	600.2	693.82
	48	476.3	548.86	427.15	441.19	523.11	438.85	370.97	534.81	441.19	502.04	539.49	518.43	572.26	525.45	546.52	572.26	492.68	593.33	605.03	546.52	530.13	637.8	595.67	530.13	630.77	628.43	647.16	626.09	600.35	588.64	637.8	607.37	689.29	696.31	663.54	642.48	642.48	670.56	583.96	677.59	724.4	712.69	691.63	733.76	754.82	708.01	759.5	747.8
	49	437.97	423.93	409.89	435.63	395.84	512.87	423.93	496.49	461.38	547.98	461.38	444.99	433.29	440.31	501.17	477.76	461.38	459.04	540.96	505.85	566.7	510.53	562.02	618.19	597.13	503.51	571.38	604.15	557.34	583.09	526.91	643.94	608.83	571.38	676.71	653.3	655.64	650.96	700.11	697.77	657.98	711.82	676.71	728.2	674.37	732.88	714.16	695.43
	50	291.25	237.42	345.08	356.79	321.68	340.4	274.87	382.53	368.49	230.4	384.87	321.68	366.15	317	335.72	408.28	328.7	319.34	396.57	366.15	389.55	352.1	396.57	419.98	368.49	387.21	335.72	389.55	443.39	441.04	401.26	450.41	448.07	370.83	436.36	450.41	438.7	464.45	504.24	490.2	452.75	508.92	483.17	487.86	541.69	485.51	506.58	497.22
Gala Apple (B)	1	138.09	177.88	194.26	205.97	203.63	180.22	245.76	201.29	166.18	248.1	217.67	208.31	220.01	304.27	269.16	231.71	257.46	231.71	266.82	236.39	276.18	287.89	306.61	236.39	294.91	297.25	294.91	337.04	262.14	269.16	280.86	315.97	358.1	393.21	353.42	334.7	402.57	311.29	320.65	411.93	381.51	372.15	428.32	435.34	435.34	409.59	433	430.66
	2	236.39	348.74	308.95	358.1	344.06	306.61	311.29	318.31	327.68	283.2	278.52	367.46	318.31	334.7	369.8	353.42	360.44	339.38	395.55	379.17	334.7	311.29	327.68	435.34	381.51	402.57	440.02	407.25	482.15	440.02	498.53	491.51	397.89	477.47	482.15	486.83	440.02	465.77	458.75	552.37	566.41	498.53	519.6	463.43	578.11	484.49	578.11	601.52
	3	234.05	222.35	283.2	332.36	353.42	353.42	292.57	362.78	285.55	341.72	269.16	337.04	369.8	301.93	301.93	318.31	308.95	337.04	313.63	341.72	353.42	393.21	388.53	486.83	411.93	390.87	414.27	463.43	425.98	454.06	458.75	463.43	430.66	498.53	510.24	346.4	498.53	437.68	531.3	507.9	540.66	512.58	505.56	524.28	587.47	568.75	585.13	571.09
	4	236.39	201.29	287.89	266.82	229.37	238.73	332.36	215.33	236.39	231.71	313.63	257.46	292.57	248.1	231.71	262.14	358.1	332.36	278.52	299.59	273.84	271.5	330.02	334.7	348.74	292.57	344.06	381.51	330.02	322.99	330.02	421.3	407.25	428.32	353.42	351.08	353.42	411.93	395.55	507.9	386.19	416.62	468.11	472.79	489.17	369.8	400.23	503.22
	5	159.16	238.73	152.13	156.82	180.22	187.24	152.13	266.82	238.73	168.52	168.52	241.08	166.18	287.89	311.29	236.39	245.76	245.76	229.37	273.84	224.69	252.78	259.8	276.18	208.31	264.48	231.71	297.25	325.33	278.52	297.25	273.84	271.5	266.82	285.55	285.55	346.4	337.04	287.89	308.95	402.57	440.02	386.19	327.68	395.55	318.31	390.87	414.27
	6	182.56	198.95	198.95	177.88	175.54	168.52	175.54	184.9	201.29	210.65	180.22	194.26	147.45	159.16	198.95	231.71	189.58	217.67	269.16	173.2	196.6	224.69	210.65	205.97	210.65	236.39	194.26	255.12	201.29	163.84	318.31	276.18	238.73	311.29	339.38	292.57	264.48	360.44	320.65	294.91	374.49	379.17	393.21	362.78	320.65	322.99	285.55	301.93
	7	231.71	208.31	234.05	252.78	201.29	236.39	227.03	259.8	243.42	156.82	187.24	238.73	245.76	283.2	299.59	241.08	208.31	322.99	236.39	346.4	269.16	318.31	264.48	255.12	259.8	320.65	269.16	327.68	346.4	294.91	383.85	311.29	365.12	358.1	372.15	423.64	351.08	402.57	301.93	397.89	313.63	421.3	447.04	512.58	395.55	330.02	496.19	505.56
	8	196.6	210.65	229.37	173.2	140.43	187.24	234.05	119.37	236.39	245.76	166.18	245.76	264.48	224.69	210.65	236.39	212.99	245.76	182.56	196.6	198.95	264.48	203.63	227.03	301.93	318.31	290.23	353.42	315.97	222.35	271.5	245.76	208.31	320.65	231.71	234.05	194.26	294.91	308.95	264.48	402.57	320.65	358.1	369.8	362.78	344.06	353.42	409.59
	9	259.8	409.59	311.29	341.72	290.23	337.04	327.68	346.4	250.44	440.02	374.49	304.27	245.76	365.12	463.43	390.87	404.91	411.93	423.64	400.23	423.64	454.06	388.53	440.02	479.81	444.7	500.87	430.66	545.34	486.83	491.51	461.09	554.71	528.96	512.58	493.85	510.24	512.58	486.83	587.47	582.79	617.9	610.88	557.05	589.82	660.03	638.97	566.41
	10	248.1	243.42	241.08	241.08	220.01	262.14	264.48	255.12	231.71	341.72	280.86	297.25	234.05	283.2	266.82	334.7	250.44	308.95	334.7	341.72	301.93	299.59	344.06	334.7	351.08	306.61	360.44	386.19	386.19	337.04	339.38	388.53	414.27	372.15	388.53	404.91	369.8	388.53	285.55	390.87	409.59	404.91	461.09	433	442.36	444.7	456.4	491.51
	11	234.05	257.46	273.84	381.51	362.78	379.17	287.89	337.04	332.36	358.1	411.93	334.7	390.87	358.1	376.83	407.25	379.17	454.06	395.55	393.21	407.25	472.79	435.34	449.38	477.47	475.13	416.62	479.81	433	470.45	475.13	503.22	482.15	517.26	531.3	503.22	493.85	573.43	500.87	538.32	594.5	596.84	594.5	653.01	559.39	610.88	566.41	692.8
	12	276.18	220.01	191.92	180.22	238.73	161.5	234.05	273.84	245.76	241.08	215.33	231.71	257.46	285.55	306.61	231.71	264.48	252.78	290.23	304.27	273.84	234.05	264.48	290.23	285.55	322.99	386.19	318.31	360.44	269.16	372.15	280.86	332.36	339.38	437.68	404.91	325.33	395.55	383.85	339.38	482.15	461.09	449.38	425.98	386.19	421.3	390.87	498.53
	13	175.54	147.45	210.65	119.37	205.97	175.54	220.01	182.56	191.92	135.75	184.9	166.18	170.86	154.48	191.92	255.12	189.58	173.2	212.99	173.2	250.44	231.71	266.82	273.84	210.65	234.05	243.42	236.39	308.95	290.23	306.61	311.29	297.25	269.16	285.55	245.76	325.33	229.37	334.7	322.99	290.23	344.06	372.15	294.91	355.76	266.82	266.82	425.98
	14	215.33	128.73	189.58	117.03	175.54	229.37	205.97	194.26	168.52	180.22	140.43	140.43	131.07	201.29	124.05	210.65	194.26	201.29	182.56	273.84	205.97	191.92	156.82	245.76	156.82	196.6	187.24	245.76	276.18	227.03	241.08	271.5	220.01	196.6	234.05	271.5	257.46	299.59	266.82	276.18	283.2	280.86	320.65	344.06	311.29	304.27	341.72	348.74
	15	346.4	315.97	259.8	290.23	341.72	395.55	327.68	369.8	290.23	353.42	353.42	418.96	442.36	395.55	334.7	320.65	348.74	390.87	458.75	395.55	407.25	465.77	493.85	479.81	433	468.11	407.25	538.32	489.17	482.15	491.51	461.09	538.32	585.13	507.9	510.24	510.24	552.37	571.09	599.18	552.37	564.07	587.47	589.82	596.84	622.58	606.2	697.48
	16	325.33	341.72	353.42	325.33	390.87	313.63	332.36	341.72	351.08	442.36	379.17	369.8	475.13	498.53	421.3	414.27	416.62	418.96	463.43	470.45	468.11	484.49	496.19	524.28	524.28	468.11	461.09	510.24	463.43	573.43	505.56	449.38	519.6	613.22	543	477.47	559.39	547.69	496.19	528.96	533.64	571.09	578.11	629.6	566.41	564.07	667.05	617.9
	17	304.27	304.27	365.12	416.62	334.7	390.87	276.18	339.38	510.24	437.68	418.96	425.98	447.04	341.72	381.51	353.42	472.79	414.27	447.04	414.27	489.17	433	461.09	491.51	447.04	491.51	440.02	479.81	465.77	472.79	566.41	507.9	510.24	566.41	552.37	568.75	554.71	507.9	568.75	500.87	636.63	603.86	587.47	610.88	547.69	603.86	641.31	582.79
	18	339.38	280.86	372.15	325.33	262.14	339.38	341.72	360.44	355.76	332.36	355.76	327.68	327.68	327.68	435.34	320.65	344.06	339.38	423.64	491.51	332.36	430.66	458.75	414.27	409.59	475.13	463.43	442.36	414.27	470.45	500.87	468.11	517.26	461.09	526.62	491.51	601.52	461.09	540.66	561.73	594.5	493.85	571.09	592.16	571.09	561.73	498.53	617.9
	19	276.18	208.31	339.38	203.63	306.61	203.63	320.65	255.12	217.67	245.76	273.84	271.5	227.03	262.14	234.05	245.76	287.89	266.82	248.1	306.61	236.39	318.31	330.02	318.31	322.99	290.23	367.46	297.25	344.06	318.31	325.33	395.55	334.7	376.83	358.1	461.09	362.78	428.32	386.19	395.55	402.57	409.59	404.91	444.7	477.47	454.06	561.73	472.79
	20	168.52	119.37	142.77	142.77	138.09	126.39	191.92	212.99	201.29	133.41	212.99	252.78	234.05	196.6	205.97	266.82	252.78	147.45	238.73	257.46	154.48	217.67	269.16	273.84	217.67	269.16	269.16	231.71	259.8	208.31	285.55	250.44	313.63	262.14	252.78	245.76	278.52	255.12	266.82	285.55	337.04	301.93	283.2	294.91	386.19	313.63	241.08	308.95
	21	95.96	81.92	152.13	135.75	110.01	156.82	152.13	102.98	131.07	220.01	107.66	170.86	126.39	184.9	138.09	138.09	70.22	166.18	149.79	152.13	177.88	173.2	245.76	128.73	168.52	163.84	140.43	262.14	208.31	170.86	243.42	166.18	245.76	245.76	222.35	236.39	215.33	224.69	201.29	196.6	257.46	294.91	248.1	299.59	210.65	262.14	241.08	294.91
	22	133.41	131.07	135.75	131.07	168.52	105.32	154.48	117.03	105.32	201.29	114.69	194.26	112.35	119.37	154.48	121.71	149.79	124.05	250.44	184.9	156.82	149.79	95.96	161.5	159.16	175.54	210.65	191.92	191.92	152.13	229.37	149.79	170.86	201.29	205.97	210.65	224.69	177.88	154.48	191.92	264.48	222.35	236.39	180.22	177.88	264.48	259.8	252.78
	23	152.13	184.9	154.48	117.03	117.03	67.88	173.2	138.09	154.48	224.69	121.71	231.71	119.37	140.43	159.16	154.48	135.75	114.69	135.75	184.9	175.54	196.6	198.95	236.39	196.6	145.11	201.29	159.16	205.97	208.31	208.31	262.14	271.5	220.01	184.9	189.58	250.44	283.2	149.79	198.95	208.31	198.95	182.56	262.14	266.82	243.42	201.29	257.46
	24	201.29	217.67	250.44	257.46	269.16	166.18	187.24	245.76	255.12	259.8	262.14	245.76	180.22	257.46	315.97	215.33	306.61	318.31	304.27	322.99	269.16	339.38	276.18	266.82	334.7	290.23	294.91	372.15	372.15	358.1	322.99	285.55	388.53	360.44	315.97	344.06	400.23	367.46	379.17	388.53	411.93	416.62	430.66	470.45	468.11	463.43	372.15	461.09
	25	95.96	126.39	86.6	107.66	140.43	208.31	84.26	182.56	182.56	196.6	210.65	201.29	140.43	166.18	147.45	194.26	156.82	180.22	222.35	175.54	182.56	234.05	168.52	168.52	201.29	220.01	135.75	255.12	205.97	208.31	238.73	222.35	222.35	166.18	269.16	203.63	170.86	212.99	201.29	201.29	234.05	220.01	217.67	285.55	269.16	231.71	212.99	208.31
	26	187.24	220.01	173.2	177.88	154.48	145.11	154.48	224.69	201.29	287.89	201.29	229.37	299.59	278.52	269.16	264.48	353.42	308.95	243.42	231.71	234.05	313.63	287.89	285.55	337.04	409.59	332.36	280.86	278.52	327.68	313.63	325.33	360.44	330.02	341.72	344.06	355.76	386.19	395.55	280.86	395.55	393.21	442.36	376.83	360.44	332.36	379.17	341.72
	27	271.5	285.55	250.44	306.61	344.06	301.93	278.52	299.59	278.52	353.42	299.59	266.82	367.46	334.7	428.32	376.83	339.38	276.18	409.59	409.59	381.51	381.51	292.57	360.44	418.96	367.46	458.75	479.81	372.15	425.98	433	472.79	472.79	479.81	505.56	503.22	430.66	564.07	482.15	531.3	482.15	503.22	498.53	524.28	587.47	519.6	554.71	596.84
	28	194.26	98.3	145.11	210.65	250.44	175.54	187.24	287.89	271.5	224.69	248.1	283.2	294.91	299.59	273.84	287.89	290.23	210.65	280.86	287.89	285.55	278.52	294.91	287.89	292.57	301.93	255.12	313.63	360.44	351.08	301.93	320.65	348.74	332.36	374.49	414.27	351.08	365.12	283.2	337.04	320.65	362.78	402.57	475.13	341.72	430.66	433	540.66
	29	243.42	290.23	271.5	259.8	337.04	280.86	294.91	322.99	273.84	297.25	276.18	430.66	294.91	292.57	437.68	348.74	374.49	386.19	390.87	355.76	332.36	355.76	416.62	304.27	355.76	374.49	365.12	477.47	503.22	339.38	418.96	442.36	367.46	496.19	463.43	381.51	550.03	512.58	449.38	521.94	540.66	585.13	578.11	557.05	507.9	519.6	514.92	580.45
	30	259.8	290.23	231.71	266.82	224.69	241.08	287.89	318.31	205.97	259.8	236.39	250.44	299.59	241.08	252.78	308.95	259.8	264.48	308.95	337.04	355.76	355.76	325.33	381.51	334.7	304.27	365.12	360.44	428.32	322.99	308.95	339.38	397.89	285.55	442.36	355.76	390.87	421.3	325.33	440.02	414.27	442.36	482.15	447.04	458.75	475.13	454.06	475.13
	31	152.13	229.37	191.92	117.03	133.41	175.54	149.79	194.26	133.41	191.92	184.9	175.54	203.63	201.29	145.11	187.24	194.26	184.9	166.18	224.69	173.2	147.45	142.77	198.95	229.37	182.56	229.37	245.76	212.99	266.82	227.03	245.76	210.65	224.69	175.54	252.78	217.67	290.23	262.14	187.24	262.14	273.84	262.14	271.5	212.99	236.39	229.37	259.8
	32	105.32	152.13	138.09	175.54	170.86	187.24	152.13	95.96	154.48	173.2	84.26	154.48	140.43	138.09	236.39	250.44	149.79	220.01	196.6	177.88	175.54	121.71	154.48	147.45	168.52	205.97	203.63	149.79	187.24	147.45	201.29	257.46	189.58	234.05	241.08	220.01	135.75	313.63	166.18	191.92	217.67	220.01	266.82	227.03	208.31	269.16	231.71	287.89
	33	212.99	124.05	177.88	170.86	198.95	168.52	126.39	140.43	196.6	217.67	189.58	173.2	205.97	210.65	110.01	117.03	117.03	241.08	152.13	175.54	138.09	208.31	259.8	180.22	191.92	170.86	245.76	201.29	184.9	212.99	208.31	187.24	196.6	220.01	250.44	220.01	205.97	191.92	189.58	257.46	220.01	290.23	231.71	283.2	236.39	227.03	285.55	320.65
	34	187.24	236.39	145.11	231.71	238.73	201.29	250.44	271.5	217.67	227.03	180.22	180.22	294.91	220.01	234.05	236.39	299.59	187.24	299.59	292.57	243.42	297.25	278.52	269.16	252.78	262.14	285.55	283.2	339.38	257.46	285.55	369.8	339.38	360.44	348.74	301.93	341.72	290.23	362.78	365.12	346.4	393.21	358.1	372.15	414.27	395.55	365.12	428.32
	35	210.65	203.63	131.07	245.76	236.39	205.97	196.6	231.71	280.86	269.16	252.78	259.8	257.46	273.84	299.59	217.67	313.63	311.29	238.73	238.73	269.16	297.25	306.61	271.5	322.99	297.25	292.57	280.86	287.89	285.55	306.61	308.95	315.97	332.36	339.38	320.65	372.15	376.83	374.49	433	463.43	376.83	360.44	447.04	444.7	435.34	404.91	376.83
	36	100.64	220.01	140.43	196.6	175.54	149.79	95.96	210.65	231.71	140.43	175.54	194.26	173.2	208.31	175.54	210.65	177.88	205.97	205.97	273.84	231.71	210.65	229.37	194.26	215.33	297.25	255.12	238.73	252.78	191.92	205.97	217.67	231.71	241.08	262.14	259.8	262.14	264.48	322.99	276.18	304.27	330.02	318.31	297.25	297.25	301.93	339.38	325.33
	37	138.09	194.26	187.24	184.9	152.13	189.58	231.71	262.14	215.33	210.65	210.65	208.31	205.97	229.37	255.12	234.05	252.78	280.86	241.08	234.05	208.31	301.93	227.03	285.55	243.42	273.84	234.05	248.1	248.1	271.5	257.46	320.65	304.27	294.91	308.95	276.18	325.33	341.72	276.18	322.99	294.91	271.5	362.78	400.23	290.23	315.97	351.08	374.49
	38	243.42	234.05	271.5	287.89	238.73	241.08	266.82	294.91	180.22	292.57	238.73	276.18	273.84	322.99	311.29	290.23	229.37	269.16	290.23	255.12	294.91	315.97	365.12	381.51	322.99	255.12	294.91	386.19	315.97	344.06	402.57	332.36	430.66	379.17	418.96	360.44	435.34	451.72	351.08	369.8	409.59	428.32	299.59	505.56	458.75	458.75	395.55	472.79
	39	355.176	352.397	378.436	380.922	386.921	379.314	383.411	415.299	394.087	429.196	405.644	427.878	428.171	415.006	455.672	426.564	448.944	439.289	466.791	475.568	473.814	491.952	491.805	496.779	506.728	510.091	516.381	540.518	524.572	533.788	554.415	531.887	558.071	565.386	580.891	594.351	593.912	593.617	592.741	591.424	600.786	635.309	633.994	649.791	640.723	643.794	673.928	674.512
	40	324.242	331.264	325.803	334.385	365.747	357.478	363.253	397.423	377.139	374.487	366.684	391.493	383.535	401.949	424.574	398.202	413.651	406.785	430.191	437.681	428.942	457.964	466.391	474.347	468.263	469.2	483.242	508.989	500.563	481.527	521.003	507.271	527.401	535.514	557.517	556.423	546.125	551.43	535.982	548.933	582.637	600.113	615.403	604.483	620.397	599.957	611.193	633.505
	41	335.009	349.988	362.471	367.619	394.927	381.507	382.444	392.587	406.161	389.154	395.707	422.233	391.181	413.494	457.029	421.452	420.983	448.915	453.127	455.936	457.34	487.455	500.407	516.635	482.15	500.719	509.769	525.529	494.477	512.109	517.727	530.21	545.189	554.707	589.345	547.217	582.949	584.977	559.699	568.752	602.765	614.625	625.857	630.853	637.251	632.881	645.987	671.265
	42	220.945	230.154	246.381	247.941	267.289	250.125	257.304	269.473	253.871	273.686	270.721	271.346	276.963	288.199	292.567	273.53	305.987	298.185	312.383	309.575	308.013	317.221	325.959	337.349	328.455	332.825	333.759	376.515	351.393	352.484	372.769	370.899	385.877	399.139	402.104	396.175	402.729	398.671	408.189	439.397	429.567	443.922	468.733	459.526	469.979	463.737	470.447	491.981
	43	244.663	246.224	251.685	248.254	247.941	266.977	254.963	266.665	268.538	283.986	267.601	280.553	280.397	299.745	311.137	293.19	287.574	313.32	326.271	329.235	313.32	333.76	333.761	348.583	338.286	354.512	340.47	377.451	374.485	355.294	392.43	373.394	384.004	402.884	403.665	398.984	401.479	414.12	401.792	419.267	451.411	463.114	475.128	475.754	456.561	450.007	468.731	507.271
	44	133.411	136.687	151.822	147.454	158.844	139.341	163.681	171.327	141.213	184.746	166.489	200.974	174.759	163.213	173.513	176.008	178.194	180.846	202.066	189.739	185.995	194.419	199.883	201.599	207.216	207.528	217.669	225.784	246.225	214.08	226.721	236.863	236.549	248.255	258.083	254.808	258.083	259.956	257.929	257.458	270.566	297.248	291.629	292.567	278.525	291.318	287.417	336.881
	45	191.611	208.932	189.427	203.314	219.855	197.854	199.257	229.372	212.521	244.039	213.457	235.147	236.551	244.821	259.331	253.871	248.097	247.473	270.565	272.125	250.593	274.779	261.361	265.105	283.517	276.495	285.547	300.837	305.363	295.064	297.873	310.667	318.78	310.979	332.513	316.129	327.207	357.477	321.589	330.639	346.867	367.465	373.861	385.877	374.954	380.415	366.529	408.033
	46	190.823	209.823	200.735	225.517	215.328	216.568	220.149	244.242	231.712	244.793	226.618	246.719	217.119	228.408	266.407	255.944	259.525	255.118	286.509	273.704	250.299	283.068	296.284	297.661	282.793	271.503	288.988	321.204	294.082	307.435	325.197	317.625	328.226	340.618	344.196	338.001	343.232	359.479	346.261	361.818	367.326	395.964	382.745	382.747	387.152	381.645	423.362	425.289
	47	191.459	220.477	197.855	181.935	201.595	154.474	154.943	197.855	206.592	195.666	221.257	184.591	205.344	229.058	273.999	205.029	224.379	242.008	261.36	216.891	215.955	281.958	242.321	276.492	206.281	227.031	293.97	315.35	232.652	277.273	318.159	279.145	354.203	263.545	278.526	343.744	368.4	315.034	335.166	318.935	317.843	341.407	375.735	324.71	325.177	332.977	376.98	395.703
	48	384.628	407.409	420.829	418.487	441.112	434.092	424.261	463.427	471.541	486.363	473.413	485.271	484.802	503.84	527.869	512.734	518.195	536.452	546.593	537.386	565.006	569.687	606.042	598.084	580.765	583.105	601.36	625.236	608.071	637.407	666.271	644.74	683.125	663.933	690.927	696.387	683.749	681.253	681.408	711.679	732.119	745.384	764.419	766.137	783.299	788.448	781.428	807.018
	49	259.955	255.898	279.147	305.363	299.433	301.618	300.059	309.42	305.363	330.172	302.554	338.441	336.726	347.178	343.903	345.619	371.99	365.438	382.756	400.231	389.465	401.011	400.233	398.515	400.388	417.708	419.267	454.22	444.702	460.93	476.533	469.197	486.364	491.513	497.598	514.607	498.535	514.604	505.712	527.712	535.202	576.083	567.815	552.992	579.985	586.069	585.601	602.611
	50	253.715	265.26	253.401	282.737	296.936	268.849	277.431	281.643	291.787	304.114	283.049	335.009	331.42	316.284	342.343	315.973	315.192	342.031	357.477	349.207	359.662	359.039	370.117	365.747	369.181	358.415	384.629	423.481	379.166	406.472	407.255	418.488	430.815	437.679	433.779	433.623	442.049	439.865	444.858	446.261	473.256	479.342	483.711	503.995	503.06	494.009	487.299	535.047
[truncated: 1,840 more columns]
